# Supplementary material for: In Silico Screening Based on Predictive Algorithms as a Design Tool for Exon Skipping Oligonucleotides in Duchenne Muscular Dystrophy
Source: PLoS One. 2015 Mar 27;10(3):e0120058. doi: 10.1371/journal.pone.0120058 (PMC4376395; doi:10.1371/journal.pone.0120058)
Supplement: S2 Table — (XLSX) [file pone.0120058.s013.xlsx]

## Sheet: DatabaseOfTestedSequences_13091
Study (comments here)	Author	Chemistry	Targeted exon	Oligo	Distance from acceptor (position of last base relative to acceptor)	ACP	Distance from Donor (position of 1st base relative to donor)	Length	Length Cat.	Skip level (reported)	Skip level (num)	Skip or No skip	Skip >25/30%?	Exon Length	Exon Malueka Category	L1 (WeeEtal)	L3 (WeeEtal)	niscore	niscore_per_base	ACC_FL	ACC_LAST8	ACC_LAST15	ACC_BEST8	ACC_AVE	%GC oligo	GCs (number of)	%GC 5' intron 200 bases upstream	%GC fold increase target over 5' intron	%GC increase target over 5' intron	Decrease in GC% due to blocking by oligo	Decrease in ratio of exon to intron %GC due to oligo blocking	%GC exon	Total GCs in exon	Total GCs in target	# exon GCs blocked by oligo	Length of exon when blocked by oligo	%GC of exon when blocked by oligo	Exon v intron %GC	Exon v intron %GC after blocking by oligo	dG (TargetAsExon, RNAstructure)	dG (50BaseFlanksAroundTarget, RNA structure)	dG (100BaseFlanks, RNAstructure)	dG (200BaseFlanks, RNAstructure)	dG (ExonStartTo10BaseDownFromOligo, RNAstructure)	RNAeval target-oligo	dG TargetAsExon oligo::target (RNAcofold)	dG 50bp flanks oligo::target (RNAcofold)	dG 100bp flanks oligo::target (RNAcofold)	dG 150bp flanks oligo::target (RNAcofold)
2005 & 2009 AartsmaRus	Aartsma-Rus	2OMePS	2	h2AON1e	18	0.492	20	24	long	>25%	2	1	1	62	D	0.42	0.079	4.3541	0.181	0.00129791	0.0544869	0.00306159	0.0808129	0.509684	29	7	0.275	1.05	1.5	-0.02	0	0.29	18	7	11	38	29	1.06	1.06	-29	-33.4	-29.9	-22.7	-32.1	-32.9	-25.73	-27.54	-27.9	-20.97
2005 & 2009 AartsmaRus	Aartsma-Rus	2OMePS	2	h2AON2e	31	0.685	9	22	long	Undetected	0	0	0	62	D	0.4	0.052	-10.0439	-0.457	0.00108002	0.176034	0.00277723	0.196521	0.524234	36	8	0.275	1.31	8.5	3.83	0.14	0.29	18	7.9	10.1	40	25.2	1.06	0.92	-32.2	-31.4	-25	-25.6	-32.2	-33.5	-28.46	-24.42	-22.32	-17.54
2005 & 2009 AartsmaRus	Aartsma-Rus	2OMePS	2	h2AON3e	34	0.75	4	24	long	Undetected	0	0	0	62	D	0.42	0.044	-11.4845	-0.479	0.000852611	0.211599	0.157613	0.211599	0.536812	29	7	0.275	1.05	1.5	-0.02	0	0.29	18	7	11	38	29	1.06	1.06	-31.7	-23.8	-24.5	-27.8	-31.7	-33.3	-30.14	-19.89	-22.82	-21.01
2005 & 2009 AartsmaRus	Aartsma-Rus	2OMePS	8	h8AON3	25	0.192	138	19	short	>25%	2	1	1	182	C	0.54	0.042	-2.2357	-0.118	0.00126335	0.028329	0.00574193	0.0984135	0.476539	37	7	0.345	1.07	2.5	-0.3	-0.01	0.4	72	7	65	163	39.9	1.15	1.16	-23.6	-24.4	-24.5	-21.6	-29.1	-28.9	-20.37	-21.54	-21.51	-20.59
2005 & 2009 AartsmaRus	Aartsma-Rus	2OMePS	8	h8AON1	83	0.511	80	19	short	>25%	2	1	1	182	C	0.3	0.007	10.5243	0.554	0.00013496	0.00890775	0.00036345	0.117764	0.541873	47	9	0.345	1.36	12.5	0.87	0.03	0.4	72	8.9	63.1	163	38.7	1.15	1.12	-24.4	-31	-28.4	-26.3	-27.7	-33.4	-22.25	-27.23	-25.97	-24.28
2005 & 2009 AartsmaRus	Aartsma-Rus	2OMePS	17	h17AON1	35	0.259	121	20	short	>25%	2	1	1	176	A	0.43	0.169	5.2421	0.262	5.31e-05	0.00289315	5.48e-05	0.024236	0.475886	40	8	0.365	1.1	3.5	-0.77	-0.02	0.46	81	8	73	156	46.8	1.26	1.28	-25.2	-24.4	-19.9	-10.7	-26.1	-31.9	-21.03	-20.72	-16.82	-11.95
2005 & 2009 AartsmaRus	Aartsma-Rus	2OMePS	17	h17AON2	131	0.804	25	20	short	Up to 25%	1	1	0	176	A	0.61	0.046	10.5112	0.526	7.79e-05	0.00256412	0.000207705	0.215713	0.588625	40	8	0.365	1.1	3.5	-0.77	-0.02	0.46	81	8	73	156	46.8	1.26	1.28	-26	-22.1	-14	-26.4	-26.2	-32.1	-19.08	-19.9	-13.51	-24.35
2005 & 2009 AartsmaRus	Aartsma-Rus	2OMePS	19	h19AONeh	38	0.528	34	16	short	Up to 25%	1	1	0	88	A	0.38	0.002	8.1851	0.512	8.03e-05	0.00678653	0.000154512	0.288348	0.466625	56	9	0.355	1.58	20.5	1.33	0.04	0.5	44	9	35	72	48.7	1.41	1.37	-21.1	-23.1	-18.9	-19.2	-23.2	-30.4	-17.83	-21.32	-18.09	-15.75
2005 & 2009 AartsmaRus	Aartsma-Rus	2OMePS	29	h29AON1e	14	0.163	116	20	short	>25%	2	1	1	150	C	0.35	0.028	10.7237	0.536	0.000138824	0.0301609	0.00523615	0.0562361	0.496178	45	9	0.27	1.67	18	0.46	0.02	0.42	63	9	54	130	41.5	1.56	1.54	-29.8	-27.7	-28.3	-26.2	-32.3	-34.7	-28.96	-26.29	-25.53	-22.64
2005 & 2009 AartsmaRus	Aartsma-Rus	2OMePS	29	h29AON2e	17	0.183	113	20	short	>25%	2	1	1	150	C	0.42	0.021	9.5965	0.48	0.00441912	0.0462636	0.006868	0.0535222	0.562701	45	9	0.27	1.67	18	0.46	0.02	0.42	63	9	54	130	41.5	1.56	1.54	-30.2	-30.1	-29	-23.4	-33	-36	-29.26	-28.27	-26.92	-23.58
2005 & 2009 AartsmaRus	Aartsma-Rus	2OMePS	29	h29AON6	45	0.36	86	19	short	>25%	2	1	1	150	C	0.43	0.061	-1.00204	-0.05	0.000623856	0.076393	0.00263978	0.076393	0.462192	47	9	0.27	1.74	20	0.73	0.03	0.42	63	8.9	54.1	131	41.3	1.56	1.53	-26.8	-28	-25.8	-26	-29.3	-31.3	-25.93	-23.06	-20.82	-22.71
2005 & 2009 AartsmaRus	Aartsma-Rus	2OMePS	29	h29AON4	58	0.453	73	19	short	>25%	2	1	1	150	C	0.56	0.007	7.56562	0.398	0.000127145	0.0555573	0.00158702	0.16103	0.59177	53	10	0.27	1.96	26	1.6	0.06	0.42	63	10.1	52.9	131	40.4	1.56	1.5	-32.6	-28.7	-26.7	-31.9	-31.9	-35.2	-29.12	-26.99	-22.32	-28.74
2005 & 2009 AartsmaRus	Aartsma-Rus	2OMePS	29	h29AON9	104	0.757	28	18	short	Up to 25%	1	1	0	150	C	0.37	0.162	7.808	0.434	0.00286864	0.156679	0.12758	0.167619	0.524214	33	6	0.27	1.22	6	-1.23	-0.05	0.42	63	5.9	57.1	132	43.2	1.56	1.6	-21.9	-19.4	-20	-13.6	-18.9	-25.6	-21.47	-16.15	-20.5	-15
2005 & 2009 AartsmaRus	Aartsma-Rus	2OMePS	29	h29AON10	126	0.897	8	16	short	Undetected	0	0	0	150	C	0.47	0.083	6.6573	0.416	0.000323634	0.0318138	0.0012039	0.0318138	0.429872	56	9	0.27	2.07	29	1.67	0.06	0.42	63	9	54	134	40.3	1.56	1.49	-22.8	-21.4	-27.1	-17.3	-22.8	-29	-22.82	-18.11	-25.31	-16.49
2005 & 2009 AartsmaRus	Aartsma-Rus	2OMePS	29	h29AON11	130	0.92	5	15	short	Up to 25%	1	1	0	150	C	0.46	0.052	5.6573	0.377	0.000233794	0.0528279	0.000233794	0.0889651	0.489512	53	8	0.27	1.96	26	1.22	0.05	0.42	63	8	55.1	135	40.8	1.56	1.51	-23.9	-20.7	-21.3	-18	-23.9	-26.7	-21.71	-18.7	-18.38	-11.33
2005 & 2009 AartsmaRus	Aartsma-Rus	2OMePS	40	h40AON1e	12	0.144	122	19	short	>25%	2	1	1	153	A	0.55	0.000312	10.2764	0.541	0.00908256	0.0992383	0.0319984	0.708237	0.707934	37	7	0.32	1.16	5	-0.41	-0.01	0.4	61	7	54	134	40.3	1.25	1.26	-26.2	-26.2	-23.8	-20.1	-25.9	-27.5	-24.49	-23.56	-21.88	-19.95
2005 & 2009 AartsmaRus	Aartsma-Rus	2OMePS	40	h40AON2e	126	0.889	8	19	short	>25%	2	1	1	153	A	0.35	0.016	12.7443	0.671	0.0141571	0.0640709	0.0206535	0.24066	0.589886	58	11	0.32	1.81	26	2.57	0.08	0.4	61	11	50	134	37.3	1.25	1.17	-27	-27.4	-25	-18.3	-27	-36.2	-25.59	-26.98	-24.42	-21.93
2005 & 2009 AartsmaRus	Aartsma-Rus	2OMePS	41	h41AON1e	17	0.148	147	19	short	>25%	2	1	1	183	A	0.41	0.031	14	0.737	0.0119206	0.375239	0.0636891	0.576789	0.690183	47	9	0.395	1.19	7.5	-0.38	-0.01	0.5	92	8.9	83.1	164	50.6	1.27	1.28	-27.6	-25.2	-21.8	-23.5	-33.4	-32.9	-27.22	-22.46	-18.55	-19.71
2005 & 2009 AartsmaRus	Aartsma-Rus	2OMePS	41	h41AON2e	144	0.844	19	20	short	Up to 25%	1	1	0	183	A	0.48	0.096	-3.39256	-0.17	6.16e-06	0.0171879	1.69e-05	0.0331772	0.446616	35	7	0.395	0.89	-4.5	-1.87	-0.05	0.5	92	7	85	163	52.1	1.27	1.32	-17	-22.6	-15.7	-20.7	-20.5	-28.5	-16.22	-19.93	-13.35	-6.28
2005 & 2009 AartsmaRus	Aartsma-Rus	2OMePS	42	h42AON1e	89	0.503	89	17	short	Up to 25%	1	1	0	195	A	0.47	0.034	-2.2499	-0.132	0.00124088	0.00785755	0.00159776	0.0366368	0.410079	47	8	0.325	1.45	14.5	0.47	0.01	0.42	82	8	74	178	41.6	1.29	1.28	-20.2	-18.8	-14.7	-14.9	-23.6	-28.5	-16.97	-17.19	-13.02	-15.05
2005 & 2009 AartsmaRus	Aartsma-Rus	2OMePS	42	h42AON2e	174	0.941	3	18	short	Up to 25%	1	1	0	195	A	0.29	0.141	9.0139	0.501	6.74e-06	0.0276175	1.87e-05	0.0276175	0.394699	50	9	0.325	1.54	17.5	0.81	0.02	0.42	82	9	73	177	41.2	1.29	1.27	-21.6	-20.5	-16.7	-9.5	-16.4	-32.5	-21.29	-19.39	-16.97	-16.08
2005 & 2009 AartsmaRus	Aartsma-Rus	2OMePS	43	h43AON1e	51	0.35	104	18	short	Undetected	0	0	0	173	C	0.44	0.125	12.5711	0.698	0.00034908	0.00246479	0.0011635	0.10313	0.465917	50	9	0.27	1.85	23	0.91	0.03	0.42	73	9	64	155	41.3	1.56	1.53	-19	-25.6	-20.5	-17.9	-27.2	-32.8	-20.38	-24.06	-20.76	-16.28
2005 & 2009 AartsmaRus	Aartsma-Rus	2OMePS	43	h43AON5f	89	0.572	65	19	short	>25%	2	1	1	173	C	0.44	0.175	5.3608	0.282	3.4e-06	0.00341576	4.53e-05	0.14234	0.474663	53	10	0.27	1.96	26	1.33	0.05	0.42	73	10.1	62.9	154	40.9	1.56	1.51	-21.3	-27	-20.3	-16	-29.1	-35	-18.2	-22.88	-19.18	-21.06
2005 & 2009 AartsmaRus	Aartsma-Rus	2OMePS	43	h43AON3	131	0.818	22	20	short	Undetected	0	0	0	173	C	0.5	0.054	0.7272	0.036	0.00114318	0.116929	0.00306599	0.14262	0.48496	35	7	0.27	1.3	8	-0.94	-0.03	0.42	73	7	66	153	43.1	1.56	1.6	-20.2	-23.3	-18.9	-14.7	-25.2	-29.2	-17.81	-22.02	-18.81	-16.82
2005 & 2009 AartsmaRus	Aartsma-Rus	2OMePS	43	h43AON2e	133	0.827	21	19	short	Up to 25%	1	1	0	173	C	0.53	0.056	0.9517	0.05	0.00254929	0.119952	0.00315423	0.14262	0.532726	26	5	0.27	0.96	-1	-2	-0.07	0.42	73	4.9	68	154	44.2	1.56	1.64	-15.7	-19.9	-17	-9.3	-20.7	-24.2	-13.51	-19.03	-18.17	-12.57
2005 & 2009 AartsmaRus	Aartsma-Rus	2OMePS	43	h43AON4	136	0.847	17	20	short	Undetected	0	0	0	173	C	0.43	0.099	1.4104	0.071	0.000539441	0.221269	0.0128018	0.281062	0.494084	30	6	0.27	1.11	3	-1.59	-0.06	0.42	73	6	67	153	43.8	1.56	1.62	-16.3	-22.3	-18	-10.7	-19.8	-26.1	-14.49	-20.93	-18.23	-12.55
2005 & 2009 AartsmaRus	Aartsma-Rus	2OMePS	44	h44AON1e	14	0.162	115	19	short	>25%	2	1	1	148	C	0.3	0.077	4.62266	0.243	4.23e-07	0.00131711	3.92e-06	0.00411087	0.33888	58	11	0.285	2.04	29.5	3.27	0.11	0.36	53	11	42	129	32.5	1.26	1.14	-28	-28.5	-18.7	-19.4	-30	-35.4	-26.28	-27.28	-18.05	-16.35
2005 & 2009 AartsmaRus	Aartsma-Rus	2OMePS	44	h44AON2e	116	0.848	12	20	short	>25%	2	1	1	148	C	0.47	0.002	2.1488	0.107	0.000424419	0.489139	0.0216189	0.489139	0.492231	35	7	0.285	1.23	6.5	-0.13	0	0.36	53	7	46	128	35.9	1.26	1.26	-24.6	-20.3	-20.2	-17	-24.6	-29.9	-21.03	-20.51	-19.49	-14.97
2005 & 2009 AartsmaRus	Aartsma-Rus	2OMePS	45	h45AON5f	5	0.08	154	17	short	Up to 25%	1	1	0	176	A	0.27	0.264	2.028	0.119	6.05e-08	5.9e-05	2.41e-07	0.00130105	0.276503	65	11	0.37	1.76	28	2.03	0.05	0.46	81	11.1	69.9	159	44	1.24	1.19	-23.6	-20.8	-21	-16.5	-33.5	-35.2	-24.09	-17.6	-16.93	-15.3
2005 & 2009 AartsmaRus	Aartsma-Rus	2OMePS	45	h45AON1e	57	0.381	100	19	short	Undetected	0	0	0	176	A	0.46	0.025	2.9639	0.156	0.000600858	0.263109	0.0705659	0.320929	0.578073	42	8	0.37	1.14	5	-0.49	-0.01	0.46	81	8	73	157	46.5	1.24	1.26	-21.2	-21.6	-22.9	-18.6	-24.3	-30.7	-20.21	-20.77	-21.67	-17.81
2005 & 2009 AartsmaRus	Aartsma-Rus	2OMePS	45	h45AON3	74	0.474	84	18	short	Undetected	0	0	0	176	A	0.54	0.022	8.9856	0.499	0.00225437	0.199612	0.0081098	0.199612	0.564933	39	7	0.37	1.05	2	-0.8	-0.02	0.46	81	7	74	158	46.8	1.24	1.27	-24.4	-23.4	-19.4	-17.4	-26.6	-27.6	-22.12	-18.78	-13.87	-15.32
2005 & 2009 AartsmaRus	Aartsma-Rus	2OMePS	45	h45AON4	121	0.739	38	17	short	Undetected	0	0	0	176	A	0.35	0.026	9.6138	0.566	3.16e-05	0.00131944	5.7e-05	0.02639	0.439452	65	11	0.37	1.76	28	2.03	0.05	0.46	81	11.1	69.9	159	44	1.24	1.19	-23.5	-20.5	-26.2	-20.1	-23	-34.5	-23.18	-19.14	-22.8	-18.35
2005 & 2009 AartsmaRus	Aartsma-Rus	2OMePS	45	h45AON9f	136	0.824	23	17	short	Undetected	0	0	0	176	A	0.3	0.097	7.1667	0.422	1.35e-06	0.00147377	4.63e-06	0.00147377	0.340026	59	10	0.37	1.59	22	1.39	0.04	0.46	81	10	71	159	44.6	1.24	1.21	-18.5	-20.8	-15.2	-15	-20.9	-33.5	-18.17	-19.77	-13.77	-13.33
2005 & 2009 AartsmaRus	Aartsma-Rus	2OMePS	45	h45AON2e	153	0.926	4	19	short	Undetected	0	0	0	176	A	0.54	0.031	10.777	0.567	0.0198322	0.160356	0.0214881	0.160356	0.624385	42	8	0.37	1.14	5	-0.49	-0.01	0.46	81	8	73	157	46.5	1.24	1.26	-26.4	-20	-17.1	-22.9	-26.4	-30.8	-27.6	-19.37	-19.2	-21.56
2005 & 2009 AartsmaRus	Aartsma-Rus	2OMePS	46	h46AON25	13	0.145	119	16	short	Up to 25%	1	1	0	148	C	0.58	0.059	-1.66756	-0.104	0.0109905	0.0216507	0.0122957	0.127974	0.52766	31	5	0.245	1.27	6.5	-0.5	-0.02	0.35	52	5	47	132	35.6	1.43	1.45	-17.4	-10.3	-8.9	-4.7	-21.2	-21.5	-17.25	-8.09	-7.25	-9.56
2005 & 2009 AartsmaRus	Aartsma-Rus	2OMePS	46	h46AON20	14	0.169	113	21	short	Up to 25%	1	1	0	148	C	0.45	0.093	-0.32046	-0.015	0.00202993	0.044103	0.00318124	0.127974	0.444682	29	6	0.245	1.18	4.5	-1.01	-0.04	0.35	52	6.1	45.9	127	36.1	1.43	1.48	-21.8	-17.9	-16	-12.5	-24.9	-29.2	-22.66	-14.39	-14.13	-13.53
2005 & 2009 AartsmaRus	Aartsma-Rus	2OMePS	46	h46AON21	46	0.365	87	15	short	Undetected	0	0	0	148	C	0.46	0.115	-4.3404	-0.289	0.0062299	0.0129112	0.0062299	0.0929164	0.452686	13	2	0.245	0.53	-11.5	-2.5	-0.1	0.35	52	2	50	133	37.6	1.43	1.54	-9.7	-10.7	-4	-4.7	-11.8	-13.5	-8.61	-4.87	-2.82	-3.55
2005 & 2009 AartsmaRus	Aartsma-Rus	2OMePS	46	h46AON4g	62	0.473	71	15	short	Up to 25%	1	1	0	148	C	0.11	0.271	8	0.533	9e-06	0.00309534	9e-06	0.00473852	0.194239	60	9	0.245	2.45	35.5	2.8	0.11	0.35	52	9	43	133	32.3	1.43	1.32	-21.3	-22.9	-14.4	-17	-24.6	-28.5	-22.13	-22.75	-11.7	-11.69
2005 & 2009 AartsmaRus	Aartsma-Rus	2OMePS	46	h46AON6g	62	0.49	66	20	short	Up to 25%	1	1	0	148	C	0.24	0.203	10.9109	0.546	7.27e-06	0.0429746	0.000790377	0.0429746	0.349313	50	10	0.245	2.04	25.5	2.32	0.09	0.35	52	10	42	128	32.8	1.43	1.34	-29.7	-31.2	-22.9	-21.6	-29.7	-36.4	-30.37	-30.81	-20.59	-19.6
2005 & 2009 AartsmaRus	Aartsma-Rus	2OMePS	46	h46AON26	87	0.655	42	19	short	>25%	2	1	1	148	C	0.49	8.9e-06	4.38686	0.231	0.00566822	0.213335	0.0078331	0.404606	0.605358	42	8	0.245	1.71	17.5	1.01	0.04	0.35	52	8	44	129	34.1	1.43	1.39	-22.9	-24.5	-27	-25.8	-25.3	-32.2	-23.01	-21.88	-25.43	-23.07
2005 & 2009 AartsmaRus	Aartsma-Rus	2OMePS	46	h46AON22	89	0.672	39	20	short	>25%	2	1	1	148	C	0.45	0.013	8.60216	0.43	0.00109208	0.016014	0.0023077	0.404606	0.573154	50	10	0.245	2.04	25.5	2.32	0.09	0.35	52	10	42	128	32.8	1.43	1.34	-29.1	-29.3	-30.4	-29.8	-30.2	-37.1	-27.16	-26.55	-29.47	-26.28
2005 & 2009 AartsmaRus	Aartsma-Rus	2OMePS	46	h46AON23	95	0.696	38	15	short	>25%	2	1	1	148	C	0.37	0.017	9.2913	0.619	0.00435472	0.0179519	0.00435472	0.404606	0.592575	47	7	0.245	1.92	22.5	1.34	0.05	0.35	52	7.1	44.9	133	33.8	1.43	1.38	-22.4	-21.9	-21.2	-18.9	-23.5	-24.4	-19.99	-16.76	-19.65	-14.76
2005 & 2009 AartsmaRus	Aartsma-Rus	2OMePS	46	h46AON9g	110	0.797	23	15	short	Undetected	0	0	0	148	C	0.43	0.049	8.5496	0.57	0.00746865	0.207306	0.00746865	0.207306	0.612502	40	6	0.245	1.63	15.5	0.55	0.02	0.35	52	6	46	133	34.6	1.43	1.41	-21.9	-20.6	-20	-16.5	-22.1	-22.9	-21.1	-17.31	-16.33	-15.48
2005 & 2009 AartsmaRus	Aartsma-Rus	2OMePS	46	h46AON8g	114	0.841	14	20	short	>25%	2	1	1	148	C	0.42	0.037	10.6459	0.532	0.00576395	0.168208	0.119098	0.535659	0.651076	40	8	0.245	1.63	15.5	0.76	0.03	0.35	52	8	44	128	34.4	1.43	1.4	-28.6	-28.9	-24.5	-23.6	-29	-30.9	-26.69	-24.98	-21.97	-18.64
2005 & 2009 AartsmaRus	Aartsma-Rus	2OMePS	46	h46AON24	121	0.878	10	17	short	Up to 25%	1	1	0	148	C	0.43	0.033	8.4393	0.496	0.0127535	0.0368721	0.0148676	0.503802	0.630343	29	5	0.245	1.18	4.5	-0.8	-0.03	0.35	52	4.9	47.1	131	35.9	1.43	1.47	-18.5	-18.8	-17.5	-16.8	-18.5	-21.7	-19.39	-19.19	-12.28	-15.09
2005 & 2009 AartsmaRus	Aartsma-Rus	2OMePS	47	h47AON3	38	0.33	90	22	long	Undetected	0	0	0	150	A	0.6	0.014	5.1616	0.235	0.000277729	0.00190073	0.00116664	0.313707	0.529237	27	6	0.405	0.67	-13.5	-3.04	-0.07	0.45	67	5.9	61.1	128	47.7	1.1	1.18	-20.2	-21.1	-18.8	-24.4	-25.2	-29.1	-18.1	-18.26	-16.11	-15.86
2005 & 2009 AartsmaRus	Aartsma-Rus	2OMePS	47	h47AON5	62	0.48	69	19	short	Undetected	0	0	0	150	A	0.55	0.008	-3.4347	-0.181	1.17e-05	0.00571086	4.24e-05	0.0242997	0.476485	53	10	0.405	1.31	12.5	1.21	0.03	0.45	67	10.1	56.9	131	43.5	1.1	1.07	-23.1	-25.8	-23.5	-24.3	-27.5	-35.2	-20.95	-23.9	-19.5	-22.43
2005 & 2009 AartsmaRus	Aartsma-Rus	2OMePS	47	h47AON1e	86	0.637	46	18	short	Undetected	0	0	0	150	A	0.39	0.026	12.0251	0.668	0.00136826	0.00735824	0.00195015	0.287149	0.595484	44	8	0.405	1.09	3.5	-0.09	0	0.45	67	7.9	59.1	132	44.8	1.1	1.1	-19.6	-20.9	-21.7	-21.4	-26.2	-32.9	-17.39	-17.05	-17.97	-16.07
2005 & 2009 AartsmaRus	Aartsma-Rus	2OMePS	47	h47AON6	93	0.693	36	21	short	Undetected	0	0	0	150	A	0.38	0.109	11.7009	0.557	0.000309657	0.138777	0.00269624	0.187757	0.568459	33	7	0.405	0.81	-7.5	-1.9	-0.05	0.45	67	6.9	60.1	129	46.6	1.1	1.15	-18.5	-16.7	-23.3	-23.4	-25.6	-31	-18.28	-16.48	-18.88	-19.55
2005 & 2009 AartsmaRus	Aartsma-Rus	2OMePS	47	h47AON2e	105	0.74	24	21	short	Undetected	0	0	0	150	A	0.47	0.132	8.1575	0.388	0.000454691	0.0105524	0.0029897	0.545943	0.579841	29	6	0.405	0.72	-11.5	-2.55	-0.06	0.45	67	6.1	60.9	129	47.2	1.1	1.17	-14	-13.9	-12.9	-11.3	-20.2	-28	-13.51	-13.55	-10.58	-14.28
2005 & 2009 AartsmaRus	Aartsma-Rus	2OMePS	47	h47AON4	106	0.76	21	23	long	Undetected	0	0	0	150	A	0.49	0.121	10.5071	0.457	0.000297822	0.00678204	0.00244685	0.545943	0.572812	35	8	0.405	0.86	-5.5	-1.75	-0.04	0.45	67	8.1	58.9	127	46.4	1.1	1.15	-19.6	-22.1	-19.7	-15.2	-25.5	-34.7	-19.22	-19.93	-16.36	-17.7
2005 & 2009 AartsmaRus	Aartsma-Rus	2OMePS	48	h48AON1e	18	0.142	152	16	short	Undetected	0	0	0	186	C	0.42	0.18	10.8882	0.681	0.0010081	0.00361652	0.0010145	0.382824	0.520602	38	6	0.22	1.73	16	-0.07	0	0.39	72	6.1	65.9	170	38.8	1.76	1.76	-16.2	-12.8	-11.3	-10.5	-12.6	-23.4	-14.51	-12.12	-13.46	-13.08
2005 & 2009 AartsmaRus	Aartsma-Rus	2OMePS	48	h48AON6	22	0.172	145	19	short	Up to 25%	1	1	0	186	C	0.51	0.206	12.1522	0.64	9.04e-05	0.0211633	0.000121332	0.184409	0.491456	37	7	0.22	1.68	15	-0.19	-0.01	0.39	72	7	65	167	38.9	1.76	1.77	-23.6	-23.4	-21.5	-20.2	-22.5	-28.5	-21.3	-19.13	-21.28	-19.87
2005 & 2009 AartsmaRus	Aartsma-Rus	2OMePS	48	h48AON7	31	0.22	136	19	short	Up to 25%	1	1	0	186	C	0.62	0.104	4.1528	0.219	0.000803331	0.0281472	0.00404041	0.184409	0.589499	21	4	0.22	0.95	-1	-2.01	-0.09	0.39	72	4	68	167	40.7	1.76	1.85	-18.7	-17.5	-15.7	-14.3	-19.8	-22.2	-16.65	-15.8	-13.81	-15.04
2005 & 2009 AartsmaRus	Aartsma-Rus	2OMePS	48	h48AON3	36	0.247	131	19	short	Undetected	0	0	0	186	C	0.64	0.103	2.8726	0.151	0.000365844	0.658581	0.000979664	0.714608	0.618628	37	7	0.22	1.68	15	-0.19	-0.01	0.39	72	7	65	167	38.9	1.76	1.77	-21.8	-22.3	-22.1	-20.4	-23.5	-28.2	-20.89	-21.24	-20.52	-17.48
2005 & 2009 AartsmaRus	Aartsma-Rus	2OMePS	48	h48AON8	47	0.301	122	17	short	Undetected	0	0	0	186	C	0.51	0.211	6.4825	0.381	3.94e-05	0.000199148	3.98e-05	0.658581	0.515629	53	9	0.22	2.41	31	1.44	0.07	0.39	72	9	63	169	37.3	1.76	1.69	-20.7	-22.1	-19.1	-15.3	-29.7	-30.8	-22.32	-20.77	-22.26	-21.72
2005 & 2009 AartsmaRus	Aartsma-Rus	2OMePS	48	h48AON4	61	0.387	104	21	short	Undetected	0	0	0	186	C	0.54	0.245	9.1415	0.435	6.57e-05	0.0195995	0.00808863	0.0436248	0.478413	33	7	0.22	1.5	11	-0.73	-0.03	0.39	72	6.9	65.1	165	39.4	1.76	1.79	-18	-16.5	-17.9	-15	-23.2	-29.8	-19.2	-15.02	-17.68	-18.05
2005 & 2009 AartsmaRus	Aartsma-Rus	2OMePS	48	h48AON9	70	0.435	95	21	short	Up to 25%	1	1	0	186	C	0.51	0.164	14.3538	0.684	0.000565181	0.0313891	0.00701395	0.0606504	0.486671	38	8	0.22	1.73	16	-0.09	0	0.39	72	8	64	165	38.8	1.76	1.76	-21.9	-19	-18.3	-21.6	-26.8	-32.5	-23.22	-21.86	-17.7	-26.61
2005 & 2009 AartsmaRus	Aartsma-Rus	2OMePS	48	h48AON10	78	0.478	87	21	short	Up to 25%	1	1	0	186	C	0.47	0.143	14.1799	0.675	0.000369424	0.044158	0.000428551	0.0606504	0.466062	43	9	0.22	1.95	21	0.55	0.02	0.39	72	9	63	165	38.2	1.76	1.73	-24.8	-25.5	-28.7	-18.4	-32.6	-35.7	-25.06	-24.76	-23.88	-25.33
2005 & 2009 AartsmaRus	Aartsma-Rus	2OMePS	48	h48AON2e	131	0.769	34	21	short	Undetected	0	0	0	186	C	0.68	0.09	1.5896	0.076	0.000640917	0.88178	0.00897165	0.88178	0.681867	33	7	0.22	1.5	11	-0.73	-0.03	0.39	72	6.9	65.1	165	39.4	1.76	1.79	-22.9	-21.1	-22.4	-14.1	-23	-26.6	-20.68	-18.08	-17.33	-19.14
2005 & 2009 AartsmaRus	Aartsma-Rus	2OMePS	49	h49AON1e	24	0.333	59	19	short	>25%	2	1	1	102	C	0.42	0.014	11.5792	0.609	0.000556829	0.00250057	0.00127123	0.324231	0.569673	47	9	0.34	1.38	13	0.89	0.03	0.43	44	8.9	35.1	83	42.2	1.27	1.24	-28.1	-28.3	-23.5	-21.4	-32	-32.2	-25.34	-24.01	-21.2	-25.79
2005 & 2009 AartsmaRus	Aartsma-Rus	2OMePS	49	h49AON2e	70	0.775	13	19	short	>25%	2	1	1	102	C	0.48	0.086	12.9328	0.681	0.00312161	0.0201672	0.00530819	0.101267	0.607463	47	9	0.34	1.38	13	0.89	0.03	0.43	44	8.9	35.1	83	42.2	1.27	1.24	-31.2	-31	-30.8	-25.7	-30.9	-32.7	-25.35	-26.26	-26.92	-27.03
2005 & 2009 AartsmaRus	Aartsma-Rus	2OMePS	50	h50AON1e	10	0.174	82	17	short	>25%	2	1	1	109	C	0.42	0.129	11.6893	0.688	3.49e-05	0.00145085	3.57e-05	0.0426932	0.397096	47	8	0.255	1.84	21.5	-0.81	-0.03	0.51	56	8	48	92	52.2	2.01	2.05	-18	-18.5	-20.5	-15.6	-25.9	-29.6	-18.02	-17.71	-19.11	-19.12
2005 & 2009 AartsmaRus	Aartsma-Rus	2OMePS	50	h50AON2e	59	0.615	35	15	short	Up to 25%	1	1	0	109	C	0.4	0.208	6.27294	0.418	7.2e-06	0.0147451	7.2e-06	0.0161471	0.483424	67	10	0.255	2.63	41.5	2.49	0.1	0.51	56	10.1	45.9	94	48.9	2.01	1.92	-18.6	-20.6	-13.3	-18.5	-18	-30.7	-15.8	-16.67	-10.33	-12.41
2005 & 2009 AartsmaRus	Aartsma-Rus	2OMePS	51	h51AON1e	67	0.333	146	20	short	>25%	2	1	1	233	A	0.62	0.032	1.23	0.062	0.000867207	0.00798519	0.000937388	0.102752	0.55289	40	8	0.26	1.54	14	-0.6	-0.02	0.46	108	8	100	213	46.9	1.78	1.81	-22.8	-22.7	-19.8	-14.2	-21.8	-32.9	-20.83	-19.95	-19.48	-19.32
2005 & 2009 AartsmaRus	Aartsma-Rus	2OMePS	51	h51AON24	131	0.607	82	20	short	Undetected	0	0	0	233	A	0.44	0.057	6.27584	0.314	0.000544171	0.0190632	0.00204579	0.148647	0.525482	50	10	0.26	1.92	24	0.34	0.01	0.46	108	10	98	213	46	1.78	1.77	-30.9	-25.7	-30	-22.1	-29.1	-35.4	-29.9	-23.22	-25.9	-24.6
2005 & 2009 AartsmaRus	Aartsma-Rus	2OMePS	51	h51AON28	159	0.734	51	23	long	>25%	2	1	1	233	A			0.34536	0.015	3.86e-05	0.00401384	0.00111086	0.27685	0.474923	30	7	0.26	1.15	4	-1.79	-0.07	0.46	108	6.9	101.1	210	48.1	1.78	1.85	-20.6	-20.7	-15	-23.8	-24.8	-33.3	-20.29	-21.96	-18.7	-23.3
2005 & 2009 AartsmaRus	Aartsma-Rus	2OMePS	51	h51AON27	180	0.807	38	15	short	Undetected	0	0	0	233	A	0.36	0.251	-4.9986	-0.333	1.67e-06	0.00133274	1.67e-06	0.00133274	0.41658	67	10	0.26	2.58	41	1.42	0.05	0.46	108	10.1	97.9	218	44.9	1.78	1.73	-21.9	-17.6	-18.9	-16.4	-20.8	-30.9	-17.43	-13.79	-14.03	-16.05
2005 & 2009 AartsmaRus	Aartsma-Rus	2OMePS	51	h51AON29	190	0.861	23	20	short	>25%	2	1	1	233	A	0.26	0.38	10.7084	0.535	5.18e-07	0.0201306	0.00013299	0.0201306	0.366002	50	10	0.26	1.92	24	0.34	0.01	0.46	108	10	98	213	46	1.78	1.77	-27.2	-24.4	-19	-21.8	-31.7	-37.5	-24.52	-16.8	-16.09	-20.09
2005 & 2009 AartsmaRus	Aartsma-Rus	2OMePS	52	h52AON1	68	0.648	32	18	short	Up to 25%	1	1	0	118	C	0.48	0.029	12.551	0.697	0.00316295	0.057246	0.0237399	0.145866	0.547862	39	7	0.28	1.39	11	-1.06	-0.04	0.45	53	7	46	100	46	1.6	1.64	-28.3	-25.7	-20.7	-18.3	-28.6	-27.2	-22.45	-22.91	-18.33	-17.9
2005 & 2009 AartsmaRus	Aartsma-Rus	2OMePS	52	h52AON2	96	0.886	6	16	short	Undetected	0	0	0	118	C	0.54	0.001	3.25944	0.204	0.0127559	0.0221704	0.0129047	0.492174	0.70424	38	6	0.28	1.36	10	-1.08	-0.04	0.45	53	6.1	46.9	102	46	1.6	1.64	-24.5	-18.2	-17.1	-20.1	-23.4	-22.8	-21.36	-14.68	-14.83	-13.6
2005 & 2009 AartsmaRus	Aartsma-Rus	2OMePS	53	h53AON1e	44	0.252	150	18	short	Up to 25%	1	1	0	212	A	0.53	0.092	10.5413	0.586	1.95e-05	0.00260741	0.000173323	0.0541301	0.582596	61	11	0.275	2.22	33.5	1.59	0.06	0.44	93	11	82	194	42.3	1.59	1.54	-27.2	-26.6	-21.4	-23	-30.4	-35.2	-24.56	-23.62	-16.49	-17.13
2005 & 2009 AartsmaRus	Aartsma-Rus	2OMePS	53	h53AON2e	127	0.644	67	18	short	Undetected	0	0	0	212	A	0.42	0.191	9.5785	0.532	3.47e-07	0.00368813	2.79e-06	0.00368813	0.441555	61	11	0.275	2.22	33.5	1.59	0.06	0.44	93	11	82	194	42.3	1.59	1.54	-22.6	-21	-21.1	-16.3	-24.2	-37.5	-22.09	-18.86	-22.1	-23.15
2005 & 2009 AartsmaRus	Aartsma-Rus	2OMePS	54	h54AON1	21	0.429	116	18	short	>25%	2	1	1	155	A	0.32	0.14	2.7596	0.153	1.47e-05	0.0254309	0.000558809	0.0292476	0.446496	50	9	0.315	1.59	18.5	0.72	0.02	0.45	69	9	60	137	43.8	1.41	1.39	-16.7	-19	-17.3	-15.7	-24.2	-30	-19.13	-17.59	-15.27	-15.92
2005 & 2009 AartsmaRus	Aartsma-Rus	2OMePS	54	h54AON2	57	0.194	79	19	short	>25%	2	1	1	155	A	0.32	0.163	9.47066	0.498	6.75e-06	0.000480188	0.000104089	0.0824056	0.360803	63	12	0.315	2	31.5	2.58	0.08	0.45	69	12	57	136	41.9	1.41	1.33	-12.7	-27.6	-17.7	-13	-24.3	-38.7	-15.19	-23.92	-17.91	-15.49
2005 & 2009 AartsmaRus	Aartsma-Rus	2OMePS	55	h55AON3	28	0.203	142	20	short	Up to 25%	1	1	0	190	C	0.5	0.02	-1.3138	-0.066	0.00234315	0.111976	0.0137912	0.111976	0.557437	35	7	0.34	1.03	1	-1.52	-0.04	0.48	91	7	84	170	49.4	1.41	1.45	-23.1	-22.7	-23.7	-20.1	-26.6	-30.5	-21	-20.4	-19.34	-20.02
2005 & 2009 AartsmaRus	Aartsma-Rus	2OMePS	55	h55AON6	33	0.224	139	18	short	>25%	2	1	1	190	C	0.39	0.226	-0.7248	-0.04	0.00217466	0.00830506	0.00560775	0.118129	0.523193	56	10	0.34	1.65	22	0.85	0.02	0.48	91	10.1	80.9	172	47	1.41	1.38	-16.5	-14.5	-19.2	-15.6	-22.7	-26.7	-15.46	-12.21	-15.22	-17.41
2005 & 2009 AartsmaRus	Aartsma-Rus	2OMePS	55	h55AON5	103	0.597	67	20	short	>25%	2	1	1	190	C	0.4	0.287	3.59896	0.18	3.29e-05	0.00161446	5.09e-05	0.0904612	0.441623	50	10	0.34	1.47	16	0.25	0.01	0.48	91	10	81	170	47.6	1.41	1.4	-29.7	-26.6	-18	-22.9	-33.6	-37.6	-28.4	-23.6	-11.64	-14.03
2005 & 2009 AartsmaRus	Aartsma-Rus	2OMePS	55	h55AON1	138	0.782	32	20	short	Up to 25%	1	1	0	190	C	0.48	0.055	9.9495	0.497	3.84e-05	0.0345444	0.000864933	0.0559139	0.477589	40	8	0.34	1.18	6	-0.93	-0.03	0.48	91	8	83	170	48.8	1.41	1.44	-24.4	-25.7	-27.9	-19.2	-28.6	-37.8	-19.98	-19.91	-20.3	-17.94
2005 & 2009 AartsmaRus	Aartsma-Rus	2OMePS	55	h55AON2	166	0.937	1	23	long	Up to 25%	1	1	0	190	C	0.6	0.08	12.7107	0.553	2.04e-05	0.00395804	0.00138887	0.227485	0.512774	39	9	0.34	1.15	5	-1.22	-0.04	0.48	91	9	82	167	49.1	1.41	1.44	-34.7	-34.5	-23.8	-22.4	-30.8	-37.9	-30.75	-29.93	-19.42	-20.88
2005 & 2009 AartsmaRus	Aartsma-Rus	2OMePS	56	h56AON1	47	0.332	106	20	short	Up to 25%	1	1	0	173	A	0.57	0.044	10.5145	0.526	0.0011074	0.282051	0.0549101	0.311585	0.657116	35	7	0.32	1.09	3	-0.94	-0.03	0.42	73	7	66	153	43.1	1.32	1.35	-26.8	-24.3	-21.3	-23.6	-26.1	-29.1	-22.94	-20.04	-21.28	-14.32
2005 & 2009 AartsmaRus	Aartsma-Rus	2OMePS	56	h56AON3	68	0.448	87	18	short	Up to 25%	1	1	0	173	A	0.44	0.008	10.5949	0.589	0.000337405	0.0093119	0.000588814	0.140322	0.499126	61	11	0.32	1.91	29	2.18	0.07	0.42	73	11	62	155	40	1.32	1.25	-32.2	-27.5	-25.1	-30.9	-31.5	-36.6	-27.09	-22.49	-22.51	-21.64
2005 & 2009 AartsmaRus	Aartsma-Rus	2OMePS	56	h56AON2	128	0.801	25	20	short	Undetected	0	0	0	173	A	0.46	0.187	12.8911	0.645	1.63e-05	0.000397476	4.83e-05	0.0549038	0.476198	45	9	0.32	1.41	13	0.37	0.01	0.42	73	9	64	153	41.8	1.32	1.31	-26.8	-26.5	-25.9	-24	-27.9	-33.8	-22.91	-22.78	-23.24	-16.92
2005 & 2009 AartsmaRus	Aartsma-Rus	2OMePS	57	h57AON3	63	0.462	76	18	short	Undetected	0	0	0	157	C	0.3	0.106	6.1766	0.343	6.47e-06	0.0938399	8.62e-05	0.0938754	0.384835	56	10	0.345	1.62	21.5	0.65	0.02	0.51	80	10.1	69.9	139	50.3	1.48	1.46	-25.3	-26.2	-19.5	-18	-29.2	-34.7	-23.46	-23.59	-19.16	-20.35
2005 & 2009 AartsmaRus	Aartsma-Rus	2OMePS	57	h57AON1	93	0.669	47	17	short	Undetected	0	0	0	157	C	0.39	0.109	2.44166	0.144	1.39e-06	0.0034316	1.73e-05	0.0253087	0.44829	65	11	0.345	1.88	30.5	1.71	0.05	0.51	80	11.1	68.9	140	49.2	1.48	1.43	-22.3	-18.9	-22.1	-18.6	-23.3	-35.6	-20.85	-17.25	-23.18	-22.25
2005 & 2009 AartsmaRus	Aartsma-Rus	2OMePS	57	h57AON2	115	0.815	21	21	short	Undetected	0	0	0	157	C	0.4	0.086	6.5576	0.312	2.87e-05	0.00197969	0.000153072	0.0751061	0.477215	57	12	0.345	1.65	22.5	0.93	0.03	0.51	80	12	68	136	50	1.48	1.45	-33.9	-31.2	-33.2	-32.9	-33.1	-40.7	-28.74	-24.98	-28.23	-26.6
2005 & 2009 AartsmaRus	Aartsma-Rus	2OMePS	58	h58AON1	8	0.161	91	22	long	Undetected	0	0	0	121	C	0.57	0.058	10.4488	0.475	0.000896884	0.207863	0.0474181	0.207863	0.649523	32	7	0.34	0.94	-2	-2.62	-0.08	0.44	53	7	46	99	46.4	1.29	1.37	-27.8	-23.4	-17.6	-18	-30.2	-31.8	-26.61	-20.6	-18.47	-20.95
2005 & 2009 AartsmaRus	Aartsma-Rus	2OMePS	58	h58AON2	86	0.785	16	19	short	Up to 25%	1	1	0	121	C	0.38	0.136	11.2757	0.593	0.000264107	0.011017	0.00247473	0.0442173	0.467445	47	9	0.34	1.38	13	0.6	0.02	0.44	53	8.9	44.1	102	43.2	1.29	1.27	-26.2	-22.5	-25.5	-24.2	-26.4	-33.4	-24.85	-22.33	-23.41	-22.51
2005 & 2009 AartsmaRus	Aartsma-Rus	2OMePS	59	h59AON1	65	0.283	183	21	short	Undetected	0	0	0	269	A	0.51	0.05	3.2858	0.156	0.000145394	0.829427	0.000308498	0.829427	0.635911	33	7	0.33	1	0	-1.77	-0.05	0.54	145	6.9	138.1	248	55.7	1.63	1.69	-16.5	-25.6	-20.5	-17	-28.4	-30.6	-18.41	-22.12	-16.78	-19.05
2005 & 2009 AartsmaRus	Aartsma-Rus	2OMePS	59	h59AON2	133	0.528	117	19	short	>25%	2	1	1	269	A	0.49	0.054	12.2645	0.646	0.000806571	0.063421	0.000983178	0.0751578	0.566249	42	8	0.33	1.27	9	-0.9	-0.03	0.54	145	8	137	250	54.8	1.63	1.66	-17.4	-25.9	-24.4	-17	-25.5	-33.2	-19.57	-21.93	-22.86	-18.93
2005 & 2009 AartsmaRus	Aartsma-Rus	2OMePS	60	h60AON1	18	0.187	111	18	short	Up to 25%	1	1	0	147	A	0.34	0.074	10.9109	0.606	0.000962216	0.0933592	0.00169203	0.0933592	0.480365	56	10	0.37	1.51	19	0.51	0.01	0.52	77	10.1	66.9	129	51.9	1.42	1.4	-21.4	-25.5	-25.3	-19.9	-24.8	-33.4	-22.08	-25.72	-22.55	-18.32
2005 & 2009 AartsmaRus	Aartsma-Rus	2OMePS	60	h60AON2	91	0.687	37	19	short	Undetected	0	0	0	147	A	0.7	0.002	3.8048	0.2	0.00861444	0.332084	0.0963734	0.455264	0.752593	53	10	0.37	1.43	16	0.09	0	0.52	77	10.1	66.9	128	52.3	1.42	1.41	-23.2	-16.6	-22.3	-20.4	-32.4	-34.6	-22.1	-16.53	-24.84	-21.75
2005 & 2009 AartsmaRus	Aartsma-Rus	2OMePS	61	h61AON1	29	0.506	31	19	short	Undetected	0	0	0	79	A	0.51	0.067	8.00382	0.421	7.51e-08	9.56e-05	1.88e-06	0.0380987	0.484116	63	12	0.335	1.88	29.5	1.51	0.05	0.58	46	12	34	60	56.7	1.74	1.69	-26.4	-26.5	-24.9	-26.5	-26.9	-39.7	-24.01	-23.32	-23.67	-28.16
2005 & 2009 AartsmaRus	Aartsma-Rus	2OMePS	61	h61AON2	51	0.753	10	18	short	Up to 25%	1	1	0	79	A	0.39	0.034	9.9682	0.554	0.000300127	0.0396952	0.00293002	0.15537	0.500457	61	11	0.335	1.82	27.5	0.82	0.02	0.58	46	11	35	61	57.4	1.74	1.71	-33.8	-32.3	-31.6	-25.8	-33.8	-36.7	-30.87	-26.38	-28.18	-26.95
2005 & 2009 AartsmaRus	Aartsma-Rus	2OMePS	62	h62AON1	14	0.369	31	16	short	>25%	2	1	1	61	C	0.35	0.201	5.3536	0.335	1.13e-07	0.000274141	1.25e-07	0.000274141	0.422001	69	11	0.395	1.75	29.5	5.3	0.13	0.54	33	11	22	45	48.8	1.37	1.24	-24.6	-27.3	-26.2	-21.4	-24.2	-35.1	-20.75	-20.45	-24.63	-24.19
2005 & 2009 AartsmaRus	Aartsma-Rus	2OMePS	62	h62AON2	33	0.738	11	17	short	Undetected	0	0	0	61	C	0.46	0.022	6.77622	0.399	0.00391253	0.134848	0.018303	0.134848	0.510696	59	10	0.395	1.49	19.5	1.9	0.05	0.54	33	10	23	44	52.2	1.37	1.32	-31.3	-26.7	-22	-25.2	-31.3	-31.4	-27.85	-23.74	-20.84	-20.5
2005 & 2009 AartsmaRus	Aartsma-Rus	2OMePS	63	h63AON1	10	0.323	33	19	short	Up to 25%	1	1	0	62	C	0.59	0.05	8.7965	0.463	2.54e-05	0.000628364	4.91e-05	0.220848	0.515934	53	10	0.32	1.66	21	2.04	0.06	0.48	30	10.1	19.9	43	46.3	1.51	1.45	-27.3	-29.9	-20.4	-24.4	-28.8	-34.4	-25.28	-24.91	-18.04	-19.85
2005 & 2009 AartsmaRus	Aartsma-Rus	2OMePS	63	h63AON2	31	0.694	10	21	short	Up to 25%	1	1	0	62	C	0.41	0.066	7.0321	0.335	6.77e-05	0.0423826	0.0111469	0.166862	0.485611	48	10	0.32	1.5	16	-0.19	-0.01	0.48	30	10.1	19.9	41	48.6	1.51	1.52	-32.9	-26.6	-22	-25.3	-32.9	-37.3	-29.5	-24.7	-22.12	-29.19
2005 & 2009 AartsmaRus	Aartsma-Rus	2OMePS	71	h71AON1	7	0.436	13	19	short	>25%	2	1	1	39	C	0.41	0.004	10.0802	0.531	0.00288878	0.0235156	0.00753522	0.072698	0.615095	47	9	0.37	1.27	10	-1.62	-0.04	0.49	19	8.9	10.1	20	50.3	1.32	1.36	-34.4	-28.6	-28.7	-28.7	-31.5	-33.7	-30.32	-25.52	-23.81	-23.43
2005 & 2009 AartsmaRus	Aartsma-Rus	2OMePS	71	h71AON2	15	0.628	6	18	short	>25%	2	1	1	39	C	0.34	0.056	7.5866	0.421	2.69e-05	0.000419502	5.14e-05	0.0493163	0.455229	50	9	0.37	1.35	13	1.11	0.03	0.49	19	9	10	21	47.6	1.32	1.29	-29.9	-27.1	-22.7	-24.6	-28.8	-32.4	-27.03	-19.45	-17.06	-18.08
2005 & 2009 AartsmaRus	Aartsma-Rus	2OMePS	72	h72AON1	19	0.447	27	20	short	>25%	2	1	1	66	C	0.5	0.009	2.04616	0.102	0.00182377	0.0513785	0.0068408	0.246987	0.585384	40	8	0.31	1.29	9	-4.35	-0.14	0.5	33	8	25	46	54.3	1.61	1.75	-28.9	-26.8	-23.3	-24.4	-31.7	-31.9	-25.25	-24.89	-19.85	-25.42
2005 & 2009 AartsmaRus	Aartsma-Rus	2OMePS	72	h72AON2	41	0.773	6	19	short	Up to 25%	1	1	0	66	C	0.43	0.173	4.0814	0.215	0.000285061	0.0155929	0.0013768	0.618056	0.515693	42	8	0.31	1.35	11	-3.23	-0.1	0.5	33	8	25	47	53.2	1.61	1.72	-21.5	-18.5	-19.3	-18.3	-15.8	-29.7	-20.24	-16.58	-16.54	-20.2
2005 & 2009 AartsmaRus	Aartsma-Rus	2OMePS	73	h73AON1	12	0.326	36	18	short	>25%	2	1	1	66	C	0.47	0.017	10.5297	0.585	0.00191004	0.057617	0.00972216	0.0643169	0.470729	44	8	0.36	1.22	8	2.3	0.06	0.38	25	7.9	17.1	48	35.6	1.05	0.99	-26.7	-26.2	-22.7	-26.6	-29.2	-29.5	-24.16	-22.57	-21.28	-18.84
2005 & 2009 AartsmaRus	Aartsma-Rus	2OMePS	73	h73AON2	30	0.621	15	21	short	Up to 25%	1	1	0	66	C	0.29	0.221	-3.66964	-0.175	7.17e-06	0.000195753	6.35e-05	0.0615634	0.347855	29	6	0.36	0.81	-7	-4.14	-0.11	0.38	25	6.1	18.9	45	42	1.05	1.17	-19.7	-20.7	-18.9	-17.9	-23.8	-29.9	-18.32	-18.92	-18.34	-17.14
2005 & 2009 AartsmaRus	Aartsma-Rus	2OMePS	74	h74AON1	50	0.371	92	17	short	>25%	2	1	1	159	C	0.54	0.028	6.37106	0.375	4.62e-05	0.0250539	0.00115195	0.0250539	0.494039	71	12	0.35	2.03	36	2.85	0.08	0.47	75	12.1	62.9	142	44.3	1.35	1.27	-29.1	-25.4	-21.2	-22.2	-29.1	-38.2	-28.88	-26.42	-22.98	-22.71
2005 & 2009 AartsmaRus	Aartsma-Rus	2OMePS	74	h74AON2	71	0.509	69	19	short	Up to 25%	1	1	0	159	C	0.22	0.135	9.6235	0.507	0.00405946	0.0447128	0.00508571	0.0449889	0.414103	53	10	0.35	1.51	18	0.79	0.02	0.47	75	10.1	64.9	140	46.4	1.35	1.32	-25.9	-25.7	-22.1	-27.5	-28.7	-36.2	-21.43	-23.34	-18.26	-24.15
2005 & 2009 AartsmaRus	Aartsma-Rus	2OMePS	75	h75AON1	32	0.172	193	19	short	>25%	2	1	1	244	A	0.46	0.061	6.8759	0.362	9.64e-05	0.00463142	0.000329632	0.465184	0.587939	47	9	0.3	1.57	17	-0.67	-0.02	0.55	134	8.9	125.1	225	55.6	1.83	1.85	-20.7	-27.1	-20.3	-23.2	-27.9	-32.4	-22.71	-25.06	-21.34	-22.73
2005 & 2009 AartsmaRus	Aartsma-Rus	2OMePS	75	h75AON2	143	0.625	83	18	short	>25%	2	1	1	244	A	0.48	0.025	6.03262	0.335	0.000865929	0.00164609	0.000977832	0.170023	0.549395	61	11	0.3	2.03	31	0.49	0.02	0.55	134	11	123	226	54.4	1.83	1.81	-25	-26.7	-22.9	-23.2	-29.7	-35.1	-20.6	-21.72	-17.24	-21.31
2005 & 2009 AartsmaRus	Aartsma-Rus	2OMePS	76	h76AON1	36	0.371	69	19	short	Undetected	0	0	0	124	A	0.19	0.28	2.5937	0.137	7.64e-05	0.0243293	0.00897667	0.222854	0.457613	53	10	0.31	1.71	22	-0.77	-0.02	0.57	71	10.1	60.9	105	58	1.85	1.87	-28.2	-27.9	-25.9	-14.8	-25.2	-36.7	-29.43	-27.55	-29.18	-17.62
2005 & 2009 AartsmaRus	Aartsma-Rus	2OMePS	76	h76AON2	64	0.597	41	19	short	Up to 25%	1	1	0	124	A	0.38	0.067	9.46176	0.498	2.84e-05	0.117488	8.04e-05	0.117488	0.464338	58	11	0.31	1.87	27	0.14	0	0.57	71	11	60	105	57.1	1.85	1.84	-26.8	-25.7	-22.5	-17.5	-25.8	-37.5	-23.67	-24.19	-19.66	-17.91
2005 & 2009 AartsmaRus	Aartsma-Rus	2OMePS	77	h77AON1	19	0.301	57	17	short	>25%	2	1	1	93	A	0.49	0.151	6.88406	0.405	3.93e-06	0.0246151	0.00010844	0.0281402	0.466322	59	10	0.255	2.31	33.5	1.65	0.06	0.52	48	10	38	76	50	2.02	1.96	-29.9	-25.6	-23.5	-26.5	-28.9	-34.4	-25.81	-24.06	-18.59	-24.57
2005 & 2009 AartsmaRus	Aartsma-Rus	2OMePS	77	h77AON2	46	0.597	29	18	short	>25%	2	1	1	93	A	0.26	0.312	9.97	0.554	7.28e-08	0.00213068	1.17e-07	0.00213068	0.326248	56	10	0.255	2.2	30.5	1.05	0.04	0.52	48	10.1	37.9	75	50.6	2.02	1.98	-24.3	-20.1	-18.1	-15.6	-29.9	-35.8	-22.17	-18.49	-19.18	-18.32
2005 & 2009 AartsmaRus	Aartsma-Rus	2OMePS	78	h78AON1	3	0.391	11	18	short	>25%	2	1	1	32	E	0.53	0.018	8.27636	0.46	5.07e-05	0.00517383	0.00456079	0.354328	0.625613	50	9	0.285	1.75	21.5	4.02	0.14	0.47	15	9	6	14	42.8	1.64	1.5	-31.2	-25	-19.4	-19.9	-31.2	-31.8	-29.69	-19.74	-17.74	-19.29
2005 & 2009 AartsmaRus	Aartsma-Rus	2OMePS	78	h78AON2	9	0.563	6	17	short	>25%	2	1	1	32	E	0.44	0.024	10.1173	0.595	0.000341019	0.00225436	0.000345848	0.0732931	0.511218	53	9	0.285	1.86	24.5	6.95	0.24	0.47	15	9	6	15	39.9	1.64	1.4	-31.3	-24.2	-20.4	-24	-30.9	-32.5	-29.76	-21.72	-18.09	-24.37
2007 Harding	Harding	2OMe	16	H16A(-17+08)	-17	-0.028	172	25	long	10-30%	1	1	0	180	C			-14.1205	-0.565	0.000215087	0.0469902	0.0119533	0.0863402	0.551464	24	6	0.34	0.71	-10	-2.58	-0.08	0.4	72	6	66	155	42.6	1.18	1.25	-5	-8.9	-11.4	-15.4	-24.7	-31.6	-5.42	-10.01	-15.7	-20.87
2007 Harding	Harding	2OMe	16	H16A(-12+19)	-12	0.017	161	31	long	>30%	2	1	1	180	C			-3.819	-0.123	7.31e-06	0.00773447	0.00144871	0.434709	0.49039	32	10	0.34	0.94	-2	-1.66	-0.05	0.4	72	9.9	62.1	149	41.7	1.18	1.23	-27.3	-25.2	-26.3	-29.3	-33.7	-46.7	-25.37	-26.34	-28.18	-32.74
2007 Harding	Harding	2OMe	16	H16A(-07+13)	-7	0.014	167	20	short	0	0	0	0	180	C			-2.3485	-0.117	0.000314216	0.00635732	0.000937988	0.434709	0.568614	35	7	0.34	1.03	1	-0.63	-0.02	0.4	72	7	65	160	40.6	1.18	1.19	-15.1	-9.5	-9.3	-13.1	-22.1	-28.3	-15.15	-11.56	-12.7	-17.37
2007 Harding	Harding	2OMe	16	H16A(-06+19)	-6	0.033	161	25	long	10-30%	1	1	0	180	C			2.1809	0.087	0.000173432	0.00773447	0.00144871	0.434709	0.509253	36	9	0.34	1.06	2	-0.65	-0.02	0.4	72	9	63	155	40.6	1.18	1.2	-26.5	-21.8	-19.9	-22.7	-29.4	-38.8	-25.86	-22.41	-20.74	-26.51
2007 Harding	Harding	2OMe	16	H16A(-06+25)	-6	0.05	155	31	long	>30%	2	1	1	180	C			7.1117	0.229	0.000132112	0.133014	0.0019827	0.434709	0.515103	32	10	0.34	0.94	-2	-1.66	-0.05	0.4	72	9.9	62.1	149	41.7	1.18	1.23	-35.3	-30.4	-30.3	-30.8	-38.2	-47.9	-34.28	-30.21	-28.71	-33.11
2007 Harding	Harding	2OMe	16	H16A(+01+25)	0	0.072	155	25	long	0	0	0	0	180	C			7.8602	0.314	0.000405456	0.133014	0.0019827	0.434709	0.519755	32	8	0.34	0.94	-2	-1.29	-0.04	0.4	72	8	64	155	41.3	1.18	1.21	-34.5	-23.8	-18.9	-19.5	-35.3	-36.5	-33.55	-20.34	-19.52	-21.49
2007 Harding	Harding	2OMe	16	H16A(+06+30)	5	0.1	150	25	long	10-30%	1	1	0	180	C			16.4382	0.658	0.000960104	0.159762	0.0684202	0.22465	0.519291	32	8	0.34	0.94	-2	-1.29	-0.04	0.4	72	8	64	155	41.3	1.18	1.21	-33.8	-20.5	-21	-24.1	-34.6	-36	-33.08	-19.26	-23.8	-25.98
2007 Harding	Harding	2OMe	16	H16A(+11+35)	10	0.128	145	25	long	10-30%	1	1	0	180	C			16.3296	0.653	0.00123193	0.126757	0.0549665	0.22465	0.501822	36	9	0.34	1.06	2	-0.65	-0.02	0.4	72	9	63	155	40.6	1.18	1.2	-36.4	-29.8	-30.2	-22.9	-37.2	-38.2	-35.59	-27.88	-31.41	-28.44
2007 Harding	Harding	2OMe	16	H16A(+12+37)	11	0.136	143	26	long	0	0	0	0	180	C			16.7998	0.646	0.00170924	0.133085	0.0649136	0.22465	0.508902	36	9	0.34	1.06	2	-0.68	-0.02	0.4	72	9.4	62.6	154	40.7	1.18	1.2	-36.9	-29.6	-31.2	-22.3	-37.7	-40.7	-36.8	-28.76	-31.54	-28.81
2007 Harding	Harding	2OMe	16	H16A(+45+67)	44	0.311	113	23	long	0	0	0	0	180	C			5.9885	0.26	0.015024	0.0725434	0.0192276	0.266919	0.586695	35	8	0.34	1.03	1	-0.73	-0.02	0.4	72	8.1	64	157	40.7	1.18	1.2	-21.2	-30.2	-32	-22	-33.1	-35.6	-19.7	-27.13	-27.75	-22.45
2007 Harding	Harding	2OMe	16	H16A(+87+109)	86	0.544	71	23	long	10-30%	1	1	0	180	C			11.8378	0.515	0.000635036	0.0263374	0.00427109	0.0740195	0.483586	52	12	0.34	1.53	18	1.76	0.05	0.4	72	12	60	157	38.2	1.18	1.12	-24.5	-27.6	-32.6	-27.5	-34	-43.9	-23.07	-23.39	-29.62	-25.98
2007 Harding	Harding	2OMe	16	H16A(+92+116)	91	0.578	64	25	long	0	0	0	0	180	C			18.2296	0.729	9.99e-06	0.00271633	0.000118652	0.0740195	0.418022	56	14	0.34	1.65	22	2.58	0.08	0.4	72	14	58	155	37.4	1.18	1.1	-30.7	-40.7	-33.6	-29.8	-37.7	-49.6	-28.12	-36.61	-29.48	-24.67
2007 Harding	Harding	2OMe	16	H16A(+105+126)	104	0.642	54	22	long	0	0	0	0	180	C			10.7702	0.49	3.26e-07	0.00701998	4.66e-05	0.0309368	0.417366	54	12	0.34	1.59	20	1.95	0.06	0.4	72	11.9	60.1	158	38.1	1.18	1.12	-27.3	-33	-28.4	-25.4	-27.6	-42.4	-26.01	-30.98	-24.22	-20.9
2007 Harding	Harding	2OMe	16	H16D(+11-11)	169	1.003	-11	22	long	0	0	0	0	180	C			1.0506	0.048	9.79e-07	0.00364203	1.56e-05	0.0331466	0.316774	45	10	0.34	1.32	11	0.7	0.02	0.4	72	9.9	62.1	158	39.3	1.18	1.16	-9.8	-29	-25.4	-19.4	-28.8	-38.8	-9.8	-24.73	-24.44	-22.74
2007 Harding	Harding	2OMe	16	H16D(+05-20)	175	1.044	-20	25	long	0	0	0	0	180	C			-2.4902	-0.1	1.83e-06	0.0295453	0.000768338	0.056894	0.380446	36	9	0.34	1.06	2	-0.65	-0.02	0.4	72	9	63	155	40.6	1.18	1.2	-1.9	-29.3	-26.9	-28.4	-30.2	-40.2	-2.09	-25.88	-23.48	-25.76
2007 Harding	Harding	2OMe	51	H51A(-01+25)	-1	0.049	208	26	long	10-30%	1	1	0	233	A			5.11922	0.197	1.81e-05	0.000780895	6.62e-05	0.140047	0.534367	50	13	0.26	1.92	24	0.46	0.02	0.46	108	13	95	207	45.9	1.78	1.77	-38.3	-39.6	-39.6	-35.3	-39.5	-50.5	-37.48	-36.96	-36.8	-35.04
2007 Harding	Harding	2OMe	51	H51A(+61+90)	60	0.324	143	30	long	>30%	2	1	1	233	A			6.9	0.23	1.03e-05	0.00262583	9.86e-05	0.130801	0.507604	40	12	0.26	1.54	14	-0.94	-0.04	0.46	108	12	96	203	47.3	1.78	1.82	-37.1	-35.4	-34	-30.3	-38.5	-51.6	-34.55	-32.61	-30.56	-30.4
2007 Harding	Harding	2OMe	51	H51A(+66+90)	65	0.335	143	25	long	>30%	2	1	1	233	A			3.976	0.159	5.03e-05	0.00262583	9.86e-05	0.119465	0.523978	43	11	0.26	1.65	17	-0.4	-0.02	0.46	108	10.8	97.2	208	46.8	1.78	1.8	-27	-28.5	-25	-21	-28.4	-42.2	-26.08	-25.96	-21.94	-22.75
2007 Harding	Harding	2OMe	51	H51A(+66+95)	65	0.345	138	30	long	>30%	2	1	1	233	A			4.8728	0.162	4.38e-08	2.85e-05	7.23e-06	0.119465	0.445514	40	12	0.26	1.54	14	-0.94	-0.04	0.46	108	12	96	203	47.3	1.78	1.82	-37.7	-39.1	-36.8	-29.3	-40.4	-53.5	-34.36	-36.69	-33.52	-30.27
2007 Harding	Harding	2OMe	51	H51A(+111+134)	110	0.526	99	24	long	0	0	0	0	233	A			8.0094	0.334	6.97e-05	0.0553581	0.00105209	0.236735	0.57248	50	12	0.26	1.92	24	0.42	0.02	0.46	108	12	96	209	45.9	1.78	1.77	-37	-37.3	-35.9	-36.5	-38.1	-44.5	-31.71	-31.88	-31.76	-27.47
2007 Harding	Harding	2OMe	51	H51A(+175+195)	174	0.794	38	21	short	0	0	0	0	233	A			-3.0471	-0.145	6.98e-07	0.00133274	1.67e-06	0.00496879	0.423261	62	13	0.26	2.38	36	1.55	0.06	0.46	108	13	95	212	44.8	1.78	1.72	-30.4	-31.3	-29.9	-27	-29.3	-43.9	-26.66	-25.89	-24.94	-21.97
2007 Harding	Harding	2OMe	51	H51A(+199+220)	198	0.899	13	22	long	0	0	0	0	233	A			13.6342	0.62	9.91e-05	0.00866454	0.00109019	0.0235734	0.428584	36	8	0.26	1.38	10	-1.08	-0.04	0.46	108	7.9	100.1	211	47.4	1.78	1.82	-25	-20.9	-23.9	-21.9	-25	-35.2	-25.06	-18.64	-20.29	-19.23
2007 Harding	Harding	2OMe	51	H51D(+16-07)	217	0.983	-7	23	long	10-30%	1	1	0	233	A			9.5064	0.413	5.24e-06	0.034683	0.000729867	0.090219	0.373842	43	10	0.26	1.65	17	-0.37	-0.01	0.46	108	9.9	98.1	210	46.7	1.78	1.8	-20.9	-34.9	-27.2	-22.8	-30.7	-40	-21.39	-32.41	-19.72	-22.83
2007 Harding	Harding	2OMe	51	H51D(+08-17)	225	1.021	-17	25	long	0	0	0	0	233	A			1.8325	0.073	0.000246369	0.244234	0.106627	0.254145	0.471079	32	8	0.26	1.23	6	-1.72	-0.07	0.46	108	8	100	208	48.1	1.78	1.85	-8.5	-36.8	-22.2	-22	-31	-38.1	-10.21	-32.86	-17.93	-19.68
2007 Harding	Harding	2OMe	53	H53A(-12+10)	-12	-0.007	202	22	long	0	0	0	0	212	A			-3.2253	-0.147	0.000397603	0.0279711	0.000989532	0.0499902	0.452984	23	5	0.275	0.84	-4.5	-2.42	-0.09	0.44	93	5.1	87.9	190	46.3	1.59	1.68	-7.6	-17.2	-14.5	-14.4	-22.5	-27.3	-6.58	-13.98	-15.14	-11.71
2007 Harding	Harding	2OMe	53	H53A(-07+18)	-7	0.024	194	25	long	0	0	0	0	212	A			8.0164	0.321	0.000195975	0.0422359	0.00631243	0.118554	0.449528	28	7	0.275	1.02	0.5	-2.12	-0.08	0.44	93	7	86	187	46	1.59	1.67	-23	-25.9	-23	-22.3	-28.6	-35.5	-21.02	-21.69	-18.64	-18.49
2007 Harding	Harding	2OMe	53	H53A(+23+47)	22	0.165	165	25	long	1-10%	0	0	0	212	A			17.6816	0.707	6.28e-06	0.0123336	0.00736746	0.555611	0.503392	44	11	0.275	1.6	16.5	0.02	0	0.44	93	11	82	187	43.8	1.59	1.59	-33.4	-32.5	-28	-24.4	-34.5	-43.7	-32.35	-31.69	-26.09	-27.09
2007 Harding	Harding	2OMe	53	H53A(+39+62)	38	0.238	150	24	long	1-10%	0	0	0	212	A			15.7512	0.656	5.15e-06	0.00260741	0.000173323	0.0541301	0.535387	58	14	0.275	2.11	30.5	1.81	0.07	0.44	93	13.9	79.1	188	42.1	1.59	1.53	-36.4	-37.5	-31.3	-33.2	-39.6	-48.2	-33.59	-34.25	-26.51	-27.05
2007 Harding	Harding	2OMe	53	H53A(+39+69)	38	0.255	143	31	long	>30%	2	1	1	212	A			18.5763	0.599	1.77e-06	0.0583746	0.000903572	0.0583746	0.492194	52	16	0.275	1.89	24.5	1.39	0.05	0.44	93	16.1	76.9	181	42.5	1.59	1.54	-46.8	-46.6	-40	-43.7	-51.1	-59.9	-45.13	-43.42	-35.21	-36.93
2007 Harding	Harding	2OMe	53	H53A(+45+69)	44	0.269	143	25	long	10-30%	1	1	0	212	A			13.3664	0.535	7.21e-06	0.0583746	0.000903572	0.0583746	0.515819	52	13	0.275	1.89	24.5	1.09	0.04	0.44	93	13	80	187	42.8	1.59	1.56	-36.3	-32.5	-28.8	-32.2	-40.6	-46.9	-35.18	-30.82	-24.28	-26.06
2007 Harding	Harding	2OMe	53	H53A(+124+145)	123	0.634	67	22	long	0	0	0	0	212	A			8.1781	0.372	3.03e-08	0.00368813	2.79e-06	0.0370829	0.43964	55	12	0.275	2	27.5	1.29	0.05	0.44	93	12.1	80.9	190	42.6	1.59	1.55	-28.7	-28.3	-27.7	-22.9	-30.3	-44.2	-26.89	-23.84	-26.54	-29.25
2007 Harding	Harding	2OMe	53	H53A(+151+175)	150	0.769	37	25	long	1-10%	0	0	0	212	A			3.21742	0.129	1.22e-05	0.0112208	0.00032423	0.0421108	0.474139	52	13	0.275	1.89	24.5	1.09	0.04	0.44	93	13	80	187	42.8	1.59	1.56	-37.6	-43.8	-37.7	-32.8	-41.1	-49.7	-35.53	-40.17	-35.26	-35.59
2007 Harding	Harding	2OMe	53	H53D(+14-07)	198	0.986	-7	21	short	1-10%	0	0	0	212	A			4.48776	0.214	0.000520918	0.00549966	0.00106063	0.193829	0.568931	38	8	0.275	1.38	10.5	-0.64	-0.02	0.44	93	8	85	191	44.5	1.59	1.62	-20.6	-32.5	-28.9	-26.8	-29.7	-33.9	-18.34	-27.38	-24.88	-23.31
2007 Harding	Harding	2OMe	53	H53D(+09-18)	203	1.024	-18	27	long	1-10%	0	0	0	212	A			5.869	0.217	7.14e-05	0.023103	0.00100818	0.193829	0.452285	37	10	0.275	1.35	9.5	-1	-0.04	0.44	93	10	83	185	44.9	1.59	1.63	-13.4	-36.7	-34.3	-29.6	-38.9	-43.8	-10.38	-31	-31.2	-31.74
2007 Wilton	Wilton	2OMePS	2	H2A(+12+41)	11	0.427	21	30	long	> 30%	2	1	1	62	D	0.39	0.084	5.1581	0.172	0.000118591	0.0618844	0.00551294	0.249452	0.50008			0.275					0.29	18			32		1.06		-35.3	-35.9	-33.7	-26.4	-38.4	-43.3	-33.54	-32.37	-33.28	-29.23
2007 Wilton	Wilton	2OMePS	3	H3A(+20+40)	19	0.323	53	21	short	> 30%	2	1	1	93	D	0.35	0.075	11.6758	0.556	2.43e-05	0.00416189	0.000114333	0.0244688	0.386792			0.27					0.54	50			72		1.99		-31	-32.7	-30.7	-31.6	-32.9	-38.2	-29.81	-30.92	-27.57	-29.33
2007 Wilton	Wilton	2OMePS	4	H4A(+11+40)	10	0.327	38	30	long	> 30%	2	1	1	78	C	0.38	0.068	12.2151	0.407	9.18e-06	0.00487386	0.00037092	0.0694718	0.460573			0.36					0.42	33			48		1.18		-46.6	-47.5	-42.9	-44.1	-49.8	-56.9	-45.9	-42.41	-40.33	-39.34
2007 Wilton	Wilton	2OMePS	5	H5A(+25+55)	24	0.43	38	31	long	> 30%	2	1	1	93	C	0.44	0.014	10.087	0.325	2.08e-05	0.0223794	0.0010393	0.0623656	0.396899			0.29					0.37	34			62		1.26		-41.7	-42.1	-41.8	-37.6	-43.8	-51.2	-37.26	-36.53	-36.12	-37.48
2007 Wilton	Wilton	2OMePS	6	H6A(+69+91)	68	0.462	82	23	long	> 30%	2	1	1	173	C	0.5	0.026	8.06594	0.351	0.0001314	0.0783526	0.0223582	0.429059	0.536244			0.325					0.42	72			150		1.28		-32.3	-33.5	-39	-33.4	-37.9	-43.2	-27.88	-30.99	-33.88	-33.39
2007 Wilton	Wilton	2OMePS	7	H7A(+45+67)	44	0.471	52	23	long	> 30%	2	1	1	119	A	0.34	0.189	11.5066	0.5	0.000562226	0.0629372	0.00788249	0.0773478	0.404545			0.3					0.46	55			96		1.54		-34.3	-35.1	-32.3	-27.2	-35.5	-43.3	-30.79	-29.48	-23.15	-18.51
2007 Wilton	Wilton	2OMePS	8	H8A(-06+18)	-7	0.03	165	24	long	N/A				182	C			5.2999	0.221	3.65e-05	0.0366865	0.00259481	0.0473269	0.463196			0.345					0.4	72			158		1.15		-14.9	-20.9	-25.1	-21.9	-30.5	-39.3	-14.44	-18.81	-22.72	-19.12
2007 Wilton	Wilton	2OMePS	9	H9A(-06+23)	-7	0.062	107	29	long	> 30%	2	1	1	129	A			9.12236	0.315	3.95e-07	0.0004875	2.95e-05	0.488041	0.501451			0.375					0.51	66			100		1.36		-32.5	-43	-43	-38.9	-44.4	-59.6	-29.7	-40.09	-39.1	-39.9
2007 Wilton	Wilton	2OMePS	10	H10A(-05+16)	-6	0.026	174	21	short	N/A				189	C			11.1444	0.531	3.14e-05	0.0119477	0.00225057	0.0525928	0.442869			0.34					0.42	79			168		1.23		-15.6	-29	-20.2	-13.7	-31.5	-39.8	-12.55	-21.95	-16.2	-10.15
2007 Wilton	Wilton	2OMePS	10	H10A(+98+119)	97	0.574	70	22	long	N/A				189	C	0.32	0.283	2.4463	0.111	7.32e-08	0.00141345	1e-05	0.0528304	0.373458			0.34					0.42	79			167		1.23		-28.6	-33.9	-28.8	-29.9	-33.2	-42.5	-25.8	-31.11	-26.7	-27.72
2007 Wilton	Wilton	2OMePS	11	H11A(+75+97)	74	0.473	85	23	long	10-30%	1	1	0	182	A	0.23	0.064	9.9578	0.433	0.00125332	0.0271287	0.00215754	0.0976618	0.509635			0.295					0.42	76			159		1.42		-27.7	-27.2	-28.3	-24.3	-31	-33.1	-24.26	-24.21	-25.29	-21.25
2007 Wilton	Wilton	2OMePS	12	H12A(+52+75)	51	0.421	76	24	long	> 30%	2	1	1	151	C	0.57	0.039	11.0526	0.461	0.00293615	0.533594	0.478655	0.794646	0.714113			0.335					0.38	57			127		1.13		-27.8	-32.7	-30.4	-26.7	-32.5	-38.9	-29.04	-32.19	-31.79	-27.59
2007 Wilton	Wilton	2OMePS	13	H13A(+77+100)	76	0.738	20	24	long	> 30%	2	1	1	120	C	0.37	0.131	11.3316	0.472	3.21e-06	0.0111223	0.000439478	0.0133935	0.404179			0.29					0.43	52			96		1.49		-32.7	-34.4	-28.4	-32	-32.4	-46.5	-28.65	-31.64	-25.33	-25.7
2007 Wilton	Wilton	2OMePS	14	H14A(+32+61)	31	0.456	41	30	long	> 30%	2	1	1	102	C	0.31	0.183	5.57776	0.186	1.08e-08	0.00270102	3.61e-05	0.138327	0.397064			0.375					0.45	46			72		1.2		-43.7	-39.6	-37.2	-41.9	-47.2	-57.3	-40.55	-41.18	-33.99	-41.1
2007 Wilton	Wilton	2OMePS	15	H15A(+48+71)	47	0.551	37	24	long	> 30%	2	1	1	108	C	0.29	0.025	3.2598	0.136	7.34e-05	0.0324699	0.0054744	0.0929875	0.394255			0.39					0.36	39			84		0.93		-34.4	-31.1	-26.1	-21	-37.2	-38.4	-30.46	-27.33	-24.1	-20.78
2007 Wilton	Wilton	2OMePS	17	H17A(-07+16)	-8	0.023	161	23	long	N/A				176	A			4.66152	0.203	2.32e-06	0.000164813	6.21e-06	0.155493	0.536154			0.365					0.46	81			153		1.26		-19.4	-28.6	-21.2	-25.2	-34.3	-42.5	-17.79	-26.44	-23.15	-24.95
2007 Wilton	Wilton	2OMePS	18	H18A(+24+53)	23	0.31	71	30	long	> 30%	2	1	1	124	A	0.42	0.025	10.293	0.343	1.2e-08	0.00207595	6.29e-05	0.581682	0.424251			0.315					0.4	50			94		1.28		-41.3	-40.7	-37.6	-36.1	-43.1	-58	-39.62	-39.44	-37.92	-33.38
2007 Wilton	Wilton	2OMePS	19	HM19A(+35+65)	34	0.568	23	31	long	> 30%	2	1	1	88	A	0.42	0.044	19.7437	0.637	3.9e-07	0.00312361	0.000111026	0.288348	0.444049			0.355					0.5	44			57		1.41		-44.6	-44	-47.1	-43.1	-45.8	-64.2	-41.28	-40.31	-43.7	-38.98
2007 Wilton	Wilton	2OMePS	20	H20A(+44+71)	43	0.238	171	28	long	N/A				242	C	0.29	0.226	12.3274	0.44	1.35e-10	1.45e-05	2.7e-06	0.0649262	0.378502			0.29					0.42	102			214		1.45		-35.5	-40.4	-31.8	-29	-40	-56.7	-37.51	-36.01	-29.01	-27.08
2007 Wilton	Wilton	2OMePS	20	H20A(147+168)	146	0.651	74	22	long	N/A				242	C	0.25	0.255	12.4883	0.568	1.62e-06	0.00685665	0.000149274	0.220063	0.426226			0.29					0.42	102			220		1.45		-22.5	-27.3	-27.1	-22.1	-26.9	-40.8	-21.7	-23.95	-21.98	-20.47
2007 Wilton	Wilton	2OMePS	21	H21A(+86+108)	85	0.536	73	23	long	10-30%	1	1	0	181	A	0.48	0.027	4.9986	0.217	2.21e-05	0.0246037	0.000374282	0.056133	0.509857			0.35					0.41	75			158		1.18		-34.6	-30.3	-31.7	-32.9	-35.4	-46.5	-31.72	-30.5	-31.35	-28.28
2007 Wilton	Wilton	2OMePS	22	H22A(+125+146)	124	0.928	0	22	long	> 30%	2	1	1	146	C	0.29	0.068	6.60034	0.3	6.4e-05	0.0376657	0.00161537	0.162965	0.508108			0.27					0.49	71			124		1.8		-42.2	-36.7	-34.9	-34.8	-38.2	-44.4	-38.52	-35.19	-31.61	-29.48
2007 Wilton	Wilton	2OMePS	23	H23A(+69+98)	68	0.392	115	30	long	> 30%	2	1	1	213	C	0.44	0.035	13.2677	0.442	1.26e-05	0.138593	0.00355783	0.340614	0.518656			0.225					0.43	92			183		1.92		-44.1	-41.5	-43.2	-44	-49.3	-57.8	-41.75	-37.47	-40.49	-41.18
2007 Wilton	Wilton	2OMePS	24	H24A(+51+73)	50	0.544	41	23	long	> 30%	2	1	1	114	A	0.34	0.078	12.6483	0.55	1.13e-06	0.00313851	7.3e-05	0.0732492	0.468083			0.37					0.42	48			91		1.14		-34.5	-34.8	-34.5	-28.7	-35.3	-48.2	-29.39	-28.65	-28.65	-29.39
2007 Wilton	Wilton	2OMePS	25	H25A(+95+119)	94	0.686	37	25	long	> 30%	2	1	1	156	A	0.39	0.191	17.6243	0.705	2.25e-06	0.0281158	0.000406658	0.0427803	0.406433			0.305					0.43	67			131		1.41		-29.4	-28.8	-27.4	-27.7	-30.8	-43.7	-26.58	-23.02	-21.77	-23.54
2007 Wilton	Wilton	2OMePS	26	H26A(-07+19)	-8	0.032	153	26	long	Up to 10%	0	0	0	171	A			8.6749	0.334	2.24e-06	0.00988327	0.000678094	0.311907	0.481204			0.28					0.41	70			145		1.46		-29.3	-40.7	-31.3	-25.6	-42.8	-50	-27.27	-38.29	-28.51	-20.75
2007 Wilton	Wilton	2OMePS	27	H27A(+82+106)	81	0.514	77	25	long	> 30%	2	1	1	183	B	0.4	0.085	13.761	0.55	4.41e-07	0.000735825	0.000226321	0.119349	0.484318			0.245					0.44	80			158		1.78		-37.6	-37.7	-33.5	-33.8	-38.8	-48.6	-33.16	-32.73	-30.05	-31.35
2007 Wilton	Wilton	2OMePS	28	H28A(+99+124)	98	0.826	11	26	long	> 30%	2	1	1	135	C	0.28	0.141	16.235	0.624	2.21e-08	0.00234001	3.1e-05	0.00596998	0.344277			0.255					0.4	54			109		1.57		-40	-41.6	-37.2	-37.8	-40.3	-54	-34.13	-38.48	-30.9	-34.15
2007 Wilton	Wilton	2OMePS	29	H29A(+57+81)	56	0.46	69	25	long	> 30%	2	1	1	150	C	0.48	0.011	10.4585	0.418	1.76e-05	0.027032	0.00522751	0.16103	0.571788			0.27					0.42	63			125		1.56		-48.4	-43.4	-42	-42.3	-47.6	-52.9	-44.97	-41.86	-37.23	-42.7
2007 Wilton	Wilton	2OMePS	30	H30A(+25+50)	24	0.231	112	26	long	> 30%	2	1	1	162	A	0.52	0.295	15.555	0.598	1.32e-07	0.00150175	0.000311639	0.0538176	0.502323			0.335					0.49	79			136		1.46		-32	-32	-28.9	-21.5	-38.9	-54.8	-27.17	-27.73	-26.2	-25.57
2007 Wilton	Wilton	2OMePS	31	H31D(+03-22)	108	1.09	-22	25	long	> 30%	2	1	1	111	C			-6.3339	-0.253	9.83e-05	0.116291	0.0045806	0.162355	0.460802			0.44					0.41	45			86		0.92		-6.7	-28.6	-32.1	-23.4	-32.5	-35.7	-4.81	-24.82	-26.1	-19.77
2007 Wilton	Wilton	2OMePS	32	H32A(44+73)	43	0.336	101	30	long	> 30%	2	1	1	174	C	0.35	0.085	10.3671	0.346	5.35e-06	0.00833822	0.000429248	0.108835	0.432882			0.29					0.38	66			144		1.31		-46	-41.2	-46.2	-42.8	-45.9	-54.8	-41.92	-39.01	-42.47	-41.61
2007 Wilton	Wilton	2OMePS	33	H33A(+64+88)	63	0.487	68	25	long	> 30%	2	1	1	156	C	0.31	0.024	11.3056	0.452	7.15e-05	0.0204372	0.00280293	0.237007	0.5289			0.275					0.38	59			131		1.38		-36	-34.2	-29.6	-33.3	-34.8	-42.5	-32.12	-31.47	-33.6	-29
2007 Wilton	Wilton	2OMePS	34	H34A(+46+70)	45	0.339	101	25	long	N/A				171	C	0.45	0.03	10.1202	0.405	0.000101314	0.233538	0.00553165	0.233538	0.540973			0.215					0.42	71			146		1.93		-35.6	-33.2	-33.8	-31.2	-38.6	-39.7	-32.26	-32.73	-29.1	-32.05
2007 Wilton	Wilton	2OMePS	34	H34A(+95+120)	94	0.629	51	26	long	N/A				171	C	0.47	0.011	15.5418	0.598	0.000218094	0.0632573	0.00337958	0.140118	0.524654			0.215					0.42	71			145		1.93		-37.6	-37.3	-31.1	-27	-38.4	-41.4	-30.25	-30.62	-26.36	-29.05
2007 Wilton	Wilton	2OMePS	35	H35A(+24+53)	23	0.214	127	30	long	> 30%	2	1	1	180	A	0.45	0.075	14.7879	0.493	1.16e-05	0.0145035	0.00544615	0.145192	0.567086			0.32					0.44	79			150		1.37		-48.7	-38	-48	-37.1	-51.2	-57.3	-46.94	-34.88	-41.49	-35.6
2007 Wilton	Wilton	2OMePS	36	H36A(+22+51)	21	0.283	78	30	long	10-30%	1	1	0	129	A	0.43	0.049	12.039	0.401	1.59e-05	0.00836015	8.09e-05	0.137026	0.495447			0.235					0.41	53			99		1.75		-45.3	-45.5	-42.4	-41.1	-44.1	-54.4	-41.23	-39.86	-35.06	-37.36
2007 Wilton	Wilton	2OMePS	37	H37A(+134+157)	133	0.851	14	24	long	> 30%	2	1	1	171	A	0.36	0.06	2.6084	0.109	5.38e-05	0.0806708	0.00588246	0.0841188	0.416883			0.385					0.47	81			147		1.23		-29.2	-33.6	-27.4	-25.9	-29.2	-40.6	-30.82	-30.82	-22.33	-26.68
2007 Wilton	Wilton	2OMePS	38	H38A(+88+112)	87	0.813	11	25	long	> 30%	2	1	1	123	A	0.38	0.016	19.1518	0.766	4.98e-05	0.0157185	0.00279995	0.0627958	0.492325			0.285					0.41	50			98		1.43		-35.1	-33.6	-29.6	-33.3	-35.1	-42.3	-33.89	-30.14	-28.34	-28.86
2007 Wilton	Wilton	2OMePS	39	H39A(+62+91)	61	0.554	47	30	long	> 30%	2	1	1	138	A	0.39	0.004	20.8967	0.697	0.0030679	0.176088	0.0558669	0.194302	0.681049			0.3					0.36	50			108		1.21		-47.6	-47.6	-45.9	-45	-52.3	-53.9	-41.26	-41.29	-41.15	-43.2
2007 Wilton	Wilton	2OMePS	40	H40A(-5+17)	-6	0.036	137	22	long	10-30%	1	1	0	153	A			7.12456	0.324	0.000229792	0.00522385	0.000643242	0.247	0.498396			0.32					0.4	61			131		1.25		-21.8	-28.7	-29	-25.6	-30.9	-36.6	-18.89	-27.76	-23.09	-25.03
2007 Wilton	Wilton	2OMePS	41	H41A(+44+69)	43	0.309	114	26	long	> 30%	2	1	1	183	A	0.26	0.195	3.7867	0.146	7.42e-10	0.000313981	1.45e-06	0.018877	0.333845			0.395					0.5	92			157		1.27		-33.9	-37	-29.9	-30	-35.5	-54.8	-32.15	-33.49	-28.14	-28.57
2007 Wilton	Wilton	2OMePS	42	H42A(-4+23)	-5	0.046	173	27	long	> 30%	2	1	1	195	A			13.7285	0.508	1.99e-06	0.012634	0.000203372	0.0420641	0.396648			0.325					0.42	82			168		1.29		-28.9	-37.6	-33.3	-40	-39.2	-52	-27.6	-32.95	-35.8	-30.38
2007 Wilton	Wilton	2OMePS	43	H43A(+101+120)	100	0.639	53	20	short	10-30%	1	1	0	173	C	0.36	0.14	7.8628	0.393	9.45e-06	0.00311268	6.92e-05	0.113687	0.413435			0.27					0.42	73			153		1.56		-23.4	-30.1	-22.5	-22.5	-29	-39.6	-21.03	-26.11	-21.72	-24.77
2007 Wilton	Wilton	2OMePS	44	H44A(+61+84)	60	0.49	64	24	long	10-30%	1	1	0	148	C	0.34	0.175	12.0692	0.503	2.73e-06	0.00348853	0.000998112	0.0340772	0.431386			0.285					0.36	53			124		1.26		-32.5	-33.1	-32	-29.5	-31.8	-43.8	-29.42	-29.89	-28.76	-29.81
2007 Wilton	Wilton	2OMePS	45	H45A(-06+20)	-7	0.037	157	26	long	Up to 10%	0	0	0	176	A			10.9223	0.42	2.55e-07	0.00112978	7.89e-06	0.0197889	0.423939			0.37					0.46	81			150		1.24		-27.2	-36.5	-34.6	-30.3	-38.9	-49.2	-27.12	-31.97	-28.34	-29.19
2007 Wilton	Wilton	2OMePS	46	H46A(+107+137)	106	0.824	11	31	long	10-30%	1	1	0	148	C	0.42	0.042	20.2071	0.652	8.57e-05	0.0338779	0.0166956	0.535659	0.586913			0.245					0.35	52			117		1.43		-45.5	-48.3	-44.1	-39.4	-47.6	-51	-42.4	-44.32	-38.25	-34.1
2007 Wilton	Wilton	2OMePS	47	H47A(-06+24)	-7	0.057	127	30	long	> 30%	2	1	1	150	A			4.01466	0.134	1.86e-06	0.00295516	0.00025348	0.0708005	0.38052			0.405					0.45	67			120		1.1		-32	-44.2	-37.3	-42.9	-38.7	-58.2	-32.16	-41.16	-38.37	-35.54
2007 Wilton	Wilton	2OMePS	48	H48A(-07+23)	-8	0.04	164	30	long	10-30%	1	1	0	186	C			3.1248	0.104	4.01e-08	0.0304489	0.000140848	0.266029	0.42454			0.22					0.39	72			156		1.76		-26.4	-33.2	-36.5	-38	-38.5	-56.1	-27.02	-36.43	-35.63	-35.49
2007 Wilton	Wilton	2OMePS	49	H49A(-11+16)	-12	0.02	87	27	long	> 30%	2	1	1	102	C			7.80193	0.289	2.82e-09	0.00664515	1.39e-05	0.0499111	0.488155			0.34					0.43	44			75		1.27		-15.7	-31.9	-30.4	-27	-35.2	-46.7	-14.04	-27.9	-28.64	-27.49
2007 Wilton	Wilton	2OMePS	50	H50A(+02+30)	1	0.147	79	29	long	Up to 10%	0	0	0	109	C	0.36	0.178	16.1863	0.558	2.18e-05	0.00229997	2.45e-05	0.0662068	0.373135			0.255					0.51	56			80		2.01		-43.1	-39.7	-43	-41.7	-51.8	-55.3	-42.36	-38.84	-35.87	-42.11
2007 Wilton	Wilton	2OMePS	52	H52A(+12+41)	11	0.225	77	30	long	> 30%	2	1	1	118	C	0.35	0.044	10.3061	0.344	2.64e-07	0.0154648	0.00020502	0.0368101	0.452708			0.28					0.45	53			88		1.6		-50.4	-49.5	-44	-40.1	-51.3	-62.3	-46.8	-45.3	-40.23	-39.11
2007 Wilton	Wilton	2OMePS	54	H54A(+67+89)	66	0.503	66	23	long	N/A				155	A	0.28	0.373	2.09136	0.091	5.95e-06	0.0034401	7.62e-06	0.0409728	0.361459			0.315					0.45	69			132		1.41		-25.3	-31.3	-24.1	-25	-35	-41.9	-24.27	-25.78	-24.56	-21.91
2007 Wilton	Wilton	2OMePS	55	H55A(+141+160)	140	0.792	30	20	short	Up to 10%	0	0	0	190	C	0.39	0.236	10.4176	0.521	2.45e-05	0.00835858	0.000225319	0.0559139	0.466786			0.34					0.48	91			170		1.41		-21.6	-21	-24.5	-17.7	-26.3	-38.8	-20.48	-18.43	-20.69	-16.95
2007 Wilton	Wilton	2OMePS	56	H56A(+102+126)	101	0.659	47	25	long	Up to 10%	0	0	0	173	A	0.4	0.082	6.29764	0.252	2.02e-05	0.0187703	0.00079411	0.0604417	0.488015			0.32					0.42	73			148		1.32		-35.7	-35.4	-32.8	-31	-37.6	-40.3	-29.53	-28.73	-22.81	-25.97
2007 Wilton	Wilton	2OMePS	57	H57A(-12+18)	-13	0.016	140	30	long	10-30%	1	1	0	157	C			-0.33918	-0.011	2.53e-06	0.000970204	0.000105142	0.283856	0.443862			0.345					0.51	80			127		1.48		-25	-41.4	-35.2	-35.3	-41.2	-53.9	-24.63	-39.94	-31.64	-28.52
2007 Wilton	Wilton	2OMePS	58	H58A(+21+45)	20	0.273	76	25	long	Up to 10%	0	0	0	121	C	0.61	0.0126	9.8754	0.395	0.00346138	0.0137571	0.00453875	0.528647	0.656801			0.34					0.44	53			96		1.29		-35.7	-32.1	-31	-29.4	-32.2	-38.2	-33.37	-27.45	-26.32	-26.13
2007 Wilton	Wilton	2OMePS	59	H59A(-06+16)	-7	0.017	254	22	long	Up to 10%	0	0	0	269	A			7.3364	0.333	5.75e-06	0.000499574	7.99e-06	0.0305429	0.429016			0.33					0.54	145			247		1.63		-16.2	-30.4	-23	-18.8	-28.3	-41.2	-19.85	-28.03	-17.9	-19.14
2007 Wilton	Wilton	2OMePS	60	H60A(+37+66)	36	0.35	81	30	long	10-30%	1	1	0	147	A	0.35	0.05	12.2081	0.407	5.62e-09	3.87e-05	1.25e-05	0.0388674	0.381774			0.37					0.52	77			117		1.42		-39.5	-41.4	-36.5	-33.8	-42.9	-63.1	-38.39	-38.71	-39.37	-39.08
2007 Wilton	Wilton	2OMePS	61	H61A(+10+40)	9	0.316	39	31	long	10-30%	1	1	0	79	A	0.39	0.098	16.4021	0.529	1.97e-10	0.00981702	6.21e-05	0.0197618	0.392467			0.335					0.58	46			48		1.74		-50.9	-50.7	-46.3	-47.6	-49.4	-69.9	-46.82	-45.94	-42.79	-44.45
2007 Wilton	Wilton	2OMePS	62	H62A(+8+34)	7	0.344	27	27	long	Up to 10%	0	0	0	61	C	0.31	0.167	7.719	0.286	2.72e-11	0.00398257	3.29e-07	0.00897119	0.379478			0.395					0.54	33			34		1.37		-41.1	-40.4	-37	-35	-41.1	-62.3	-40.37	-36.62	-35.91	-37.79
2007 Wilton	Wilton	2OMePS	63	H63A(+11+35)	10	0.371	27	25	long	Up to 10%	0	0	0	62	C	0.53	0.073	12.1443	0.486	1.74e-06	0.00694752	1.13e-05	0.220848	0.474684			0.32					0.48	30			37		1.51		-35.2	-38.9	-28.8	-32.2	-36.2	-48.2	-32.86	-33.22	-23.04	-26.21
2007 Wilton	Wilton	2OMePS	64	H64A(+47+74)	46	0.807	1	28	long	Up to 10%	0	0	0	75	C	0.4	0.015	16.4727	0.588	1.1e-06	0.00341499	4.82e-05	0.0436986	0.418393			0.4					0.47	35			47		1.17		-50.7	-51.5	-35.6	-44.9	-49.5	-57.7	-46.03	-45.49	-30.42	-41.5
2007 Wilton	Wilton	2OMePS	65	H65A(-11+14)	-12	0.005	189	25	long	N/A				202	C			2.8734	0.115	3.04e-05	0.0715485	4.6e-05	0.0870687	0.432409			0.365					0.47	94			177		1.27		-19.2	-32	-30.2	-29.4	-29.2	-41.5	-17.44	-29.69	-27.55	-25.09
2007 Wilton	Wilton	2OMePS	65	H65A(+63+87)	62	0.371	115	25	long	N/A				202	C	0.28	0.071	13.5332	0.541	1.78e-06	0.00109393	2.37e-05	0.0301844	0.352561			0.365					0.47	94			177		1.27		-34.6	-38.3	-35.1	-37.6	-43.7	-51.9	-30.37	-35.36	-31.78	-34.13
2007 Wilton	Wilton	2OMePS	65	H65D(+15-11)	187	0.993	-11	26	long	N/A				202	C			-9.3838	-0.361	1.24e-05	0.0598981	0.000820539	0.0598981	0.361503			0.365					0.47	94			176		1.27		-15.1	-34.7	-33.5	-33.8	-36.2	-41.8	-12.23	-28.92	-28.92	-30.93
2007 Wilton	Wilton	2OMePS	66	H66A(-8+19)	-9	0.058	68	27	long	Up to 10%	0	0	0	86	A			3.8281	0.142	9.22e-10	0.00146297	7.78e-05	0.0187672	0.350439			0.32					0.45	39			59		1.42		-32.1	-30.3	-33.6	-28.2	-36.8	-51.7	-31.65	-26.04	-33	-32.14
2007 Wilton	Wilton	2OMePS	67	H67A(+22+47)	21	0.218	111	26	long	Up to 10%	0	0	0	158	C	0.36	0.077	8.0455	0.309	3.87e-09	9.53e-05	7.25e-06	0.21451	0.36408			0.365					0.49	77			132		1.34		-37	-35.5	-34.9	-31.3	-37.4	-48	-33.91	-31.67	-30.35	-32.6
2007 Wilton	Wilton	2OMePS	68	H68A(+22+48)	21	0.21	119	27	long	10-30%	1	1	0	167	C	0.35	0.214	9.3271	0.345	4.86e-10	0.000800714	0.000204102	0.0585127	0.384254			0.43					0.52	87			140		1.21		-37.6	-38	-31.6	-37.2	-41.7	-56.8	-38.74	-39.56	-30.84	-29.38
2007 Wilton	Wilton	2OMePS	69	H69A(-06+18)	-7	0.049	95	24	long	Up to 10%	0	0	0	112	C			5.8218	0.243	2.33e-06	0.00163368	9.11e-05	0.180711	0.404981			0.37					0.42	47			88		1.13		-23.7	-35.8	-28.2	-36.5	-37.9	-41.6	-21.3	-29.17	-27.35	-25.35
2007 Wilton	Wilton	2OMePS	70	H70A(+98+121)	97	0.799	16	24	long	10-30%	1	1	0	137	E	0.39	0.148	5.4652	0.228	2.81e-08	7.8e-05	3.57e-06	0.02266	0.427899			0.425					0.45	62			113		1.06		-35.4	-29.4	-30.5	-20.3	-35.4	-47.9	-31.82	-28.27	-28.95	-29.2
2007 Wilton	Wilton	2OMePS	71	H71A(-03+21)	-4	0.218	19	24	long	10-30%	1	1	0	39	C			6.39784	0.267	0.000805976	0.0418737	0.0091514	0.160908	0.533808			0.37					0.49	19			15		1.32		-34.3	-38.4	-40	-37.3	-38.5	-45.1	-30.58	-33.41	-33.02	-32.24
2007 Wilton	Wilton	2OMePS	72	H72A(+02+28)	1	0.227	38	27	long	> 30%	2	1	1	66	C	0.51	0.019	6.15026	0.228	3.16e-05	0.246987	0.13136	0.312334	0.571075			0.31					0.5	33			39		1.61		-53.5	-50.1	-44.4	-48.8	-56.8	-58.5	-48.21	-42.81	-36.95	-41.47
2007 Wilton	Wilton	2OMePS	73	H73A(+06+30)	5	0.273	36	25	long	10-30%	1	1	0	66	C	0.49	0.022	13.369	0.535	0.000379994	0.057617	0.00972216	0.0643169	0.505952			0.36					0.38	25			41		1.05		-38.5	-38.7	-33.8	-37.5	-41	-41.1	-35.77	-34.95	-29.69	-28.8
2007 Wilton	Wilton	2OMePS	74	H74A(+48+72)	47	0.377	87	25	long	> 30%	2	1	1	159	C	0.45	0.106	13.2953	0.532	5.45e-07	0.0116061	0.00326486	0.0311295	0.455768			0.35					0.47	75			134		1.35		-40.6	-41.1	-35	-36	-40.2	-59.6	-43.22	-42.93	-39.61	-40.97
2007 Wilton	Wilton	2OMePS	75	H75A(+34+58)	33	0.189	186	25	long	> 30%	2	1	1	244	A	0.42	0.046	10.0497	0.402	2.07e-05	0.0111227	0.00103641	0.465184	0.589075			0.3					0.55	134			219		1.83		-33.7	-38	-32	-33.2	-38.6	-49.6	-33.24	-37.03	-35.15	-36.67
2007 Wilton	Wilton	2OMePS	76	H76A(+53+79)	52	0.532	45	27	long	Up to 10%	0	0	0	124	A	0.3	0.101	13.5853	0.503	2.24e-09	0.00179993	0.00010263	0.0210338	0.428266			0.31					0.57	71			97		1.85		-40.8	-38.1	-34.5	-25.4	-38	-56.9	-36.73	-36.64	-32.71	-29.02
2007 Wilton	Wilton	2OMePS	77	H77A(+16+42)	15	0.312	51	27	long	> 30%	2	1	1	93	A	0.47	0.129	13.202	0.489	2.35e-08	0.0471414	0.0016361	0.107836	0.450785			0.255					0.52	48			66		2.02		-42.7	-42.5	-38.2	-40.8	-41.2	-57.7	-39.81	-40.22	-36.49	-38.75
2007 Wilton	Wilton	2OMePS	78	H78A(+04+29)	3	0.516	3	26	long	> 30%	2	1	1	32	E	0.46	0.064	13.7532	0.529	1.33e-08	0.000258911	4.36e-06	0.354328	0.519458			0.285					0.47	15			6		1.64		-43.6	-33.9	-28.3	-27	-43.2	-47.7	-42.65	-29.92	-26.69	-30.14
2009 AartsmaRus	Aartsma-Rus	2OMePS	33	h33AON1#	46	0.359	91	19	short	>5%		1		156	C			9.4369	0.497	0.000173688	0.00427878	0.000636187	0.0898756	0.484897	47	9	0.275	1.71	19.5	1.27	0.05	0.38	59	8.9	50.1	137	36.5	1.38	1.33	-16.5	-20.2	-25.5	-17.7	-17.7	-31.5	-15.87	-17.65	-20.55	-14.22
2009 AartsmaRus	Aartsma-Rus	2OMePS	33	h33AON2#	77	0.554	61	18	short	>5%		1		156	C			11.3863	0.633	0.00363217	0.0492374	0.00413849	0.119322	0.586783	50	9	0.275	1.82	22.5	1.59	0.06	0.38	59	9	50	138	36.2	1.38	1.32	-26	-26.1	-15.6	-20.1	-27.6	-29.1	-22.73	-22.38	-17.81	-19.88
2009 AartsmaRus	Aartsma-Rus	2OMePS	44	PS 194	5	0.115	120	23	long	>5%		1		148	C			7.7736	0.338	7.26e-06	0.00197465	3.22e-05	0.0171288	0.324966	43	10	0.285	1.51	14.5	1.32	0.05	0.36	53	9.9	43.1	125	34.5	1.26	1.21	-31.2	-28.1	-23	-16.2	-31.6	-37.7	-29.09	-26.02	-20.39	-14.97
2009 AartsmaRus	Aartsma-Rus	2OMePS	44	PS 187	9	0.128	120	19	short	>5%		1		148	C			5.2612	0.277	1.11e-05	0.00197465	3.22e-05	0.0171288	0.311853	42	8	0.285	1.47	13.5	0.91	0.03	0.36	53	8	45	129	34.9	1.26	1.22	-25	-22.5	-17	-10.6	-25.4	-30.6	-22.36	-20.52	-14.67	-9.08
2009 AartsmaRus	Aartsma-Rus	2OMePS	44	h44AON3#	13	0.149	118	17	short	>5%		1		148	C			2.5727	0.151	7.8e-06	0.00221299	2.12e-05	0.00411087	0.315788	53	9	0.285	1.86	24.5	2.23	0.08	0.36	53	9	44	131	33.6	1.26	1.18	-22.5	-19.5	-16.9	-12.4	-23.7	-28.2	-20.65	-20.58	-14.64	-10.27
2009 AartsmaRus	Aartsma-Rus	2OMePS	44	PS 196	13	0.152	117	18	short	>5%		1		148	C			3.5727	0.198	4.75e-06	0.0023761	1.18e-05	0.00411087	0.323527	56	10	0.285	1.96	27.5	2.8	0.1	0.36	53	10.1	42.9	130	33	1.26	1.16	-24.1	-22.6	-17	-15.4	-26.1	-31.5	-22.6	-22.61	-15.42	-12.07
2009 AartsmaRus	Aartsma-Rus	2OMePS	44	PS 201	42	0.358	85	21	short	>5%		1		148	C			-4.1666	-0.198	0.00338733	0.0170267	0.0101712	0.199778	0.477186	19	4	0.285	0.67	-9.5	-2.78	-0.1	0.36	53	4	49	127	38.6	1.26	1.35	-17.3	-14.5	-14.3	-12.7	-20.2	-23.6	-14.81	-14.04	-14.79	-12.48
2009 AartsmaRus	Aartsma-Rus	2OMePS	44	PS 189	53	0.432	74	21	short	>5%		1		148	C			0.74846	0.036	2.75e-05	0.0154417	0.000231915	0.0289247	0.476348	33	7	0.285	1.16	4.5	-0.46	-0.02	0.36	53	6.9	46.1	127	36.3	1.26	1.27	-22.1	-24.3	-22	-23.2	-25.6	-31.2	-20.09	-22.14	-22.23	-28.42
2009 AartsmaRus	Aartsma-Rus	2OMePS	44	PS 188	60	0.476	68	20	short	>5%		1		148	C			8.06916	0.403	1.19e-05	0.0113405	0.000215623	0.0340772	0.407218	50	10	0.285	1.75	21.5	2.22	0.08	0.36	53	10	43	128	33.6	1.26	1.18	-26.7	-27.5	-29.5	-27.1	-27.4	-36.7	-23.52	-24.47	-26.51	-25.48
2009 AartsmaRus	Aartsma-Rus	2OMePS	44	PS 200	64	0.497	66	18	short	>5%		1		148	C			8.55006	0.475	0.000127958	0.00744994	0.00101046	0.0340772	0.496417	50	9	0.285	1.75	21.5	1.96	0.07	0.36	53	9	44	130	33.8	1.26	1.19	-22.1	-23.1	-23.9	-19.6	-21.1	-30.7	-18.96	-19.41	-19.83	-20.22
2009 AartsmaRus	Aartsma-Rus	2OMePS	44	PS 191	91	0.696	34	23	long	>5%		1		148	C			8.80396	0.383	5.38e-05	0.00276279	0.000338404	0.440833	0.447325	35	8	0.285	1.23	6.5	-0.15	-0.01	0.36	53	8.1	44.9	125	36	1.26	1.26	-30.4	-27.1	-24.3	-24	-28.3	-35.8	-27.26	-25.15	-21.74	-21.41
2009 AartsmaRus	Aartsma-Rus	2OMePS	44	PS 193	91	0.689	36	21	short	>5%		1		148	C			6.81206	0.324	0.000131685	0.00290387	0.00033485	0.440833	0.441421	38	8	0.285	1.33	9.5	0.36	0.01	0.36	53	8	45	127	35.4	1.26	1.24	-27.4	-24.1	-21.4	-19	-27.4	-33	-24.81	-23.33	-19.11	-18.82
2009 AartsmaRus	Aartsma-Rus	2OMePS	44	PS 198	91	0.679	39	18	short	Up to 5%	0	0	0	148	C			5.81206	0.323	0.0010444	0.0145237	0.00151628	0.440833	0.467871	39	7	0.285	1.37	10.5	0.44	0.02	0.36	53	7	46	130	35.4	1.26	1.24	-20.7	-19	-16.9	-12.7	-20.6	-25.9	-18.18	-16.65	-14.42	-12.36
2009 AartsmaRus	Aartsma-Rus	2OMePS	44	h44AON4#	92	0.696	35	21	short	>5%		1		148	C			6.80396	0.324	6.96e-05	0.0021013	0.000239644	0.440833	0.441235	33	7	0.285	1.16	4.5	-0.46	-0.02	0.36	53	6.9	46.1	127	36.3	1.26	1.27	-29	-22.5	-23.4	-19.9	-27.6	-33.3	-25.42	-22.93	-19.72	-19.73
2009 AartsmaRus	Aartsma-Rus	2OMePS	44	h44AON2MRP	110	0.831	13	25	long	>5%		1		148	C			2.1376	0.086	2.72e-06	0.14158	0.0162814	0.14158	0.455022	32	8	0.285	1.12	3.5	-0.77	-0.03	0.36	53	8	45	123	36.6	1.26	1.28	-30.7	-23.2	-25.8	-22.3	-30.7	-38	-28.76	-25.46	-28.14	-22.05
2009 AartsmaRus	Aartsma-Rus	2OMePS	44	PS 197	114	0.834	16	18	short	>5%		1		148	C			1.9393	0.108	0.00037231	0.0675462	0.0134005	0.0675462	0.437181	39	7	0.285	1.37	10.5	0.44	0.02	0.36	53	7	46	130	35.4	1.26	1.24	-21.2	-17.1	-19.2	-15.7	-21.7	-26.3	-18.1	-18.19	-17.6	-14.33
2009 AartsmaRus	Aartsma-Rus	2OMePS	44	PS 192	115	0.858	10	23	long	>5%		1		148	C			1.0226	0.044	0.000150125	0.067046	0.0188404	0.489139	0.489644	39	9	0.285	1.37	10.5	0.59	0.02	0.36	53	9	44	125	35.2	1.26	1.24	-30.7	-30.3	-27	-22.5	-30.7	-35.2	-26.95	-27.61	-24.65	-21.03
2009 AartsmaRus	Aartsma-Rus	2OMePS	44	PS 199	123	0.902	5	20	short	Up to 5%	0	0	0	148	C			-6.4585	-0.323	0.00328112	0.115444	0.0149377	0.489139	0.484138	30	6	0.285	1.05	1.5	-0.91	-0.03	0.36	53	6	47	128	36.7	1.26	1.29	-27.2	-17.6	-19	-15.3	-27.1	-28.1	-23.34	-16.72	-18.63	-19.14
2009 AartsmaRus	Aartsma-Rus	2OMePS	45	h45AON5mrp#	5	0.102	146	25	long	>5%		1		176	A			4.54386	0.182	4.59e-10	9.76e-05	1.12e-06	0.00130105	0.308818	60	15	0.37	1.62	23	2.31	0.06	0.46	81	15	66	151	43.7	1.24	1.18	-40.2	-37.2	-32	-32.4	-43.9	-54.4	-40.58	-33.94	-29.55	-29.06
2009 AartsmaRus	Aartsma-Rus	2OMePS	45	h45AON15#	6	0.091	151	19	short	Up to 5%	0	0	0	176	A			1.9324	0.102	1.22e-08	0.00032509	2.52e-07	0.00130105	0.256069	63	12	0.37	1.7	26	2.05	0.06	0.46	81	12	69	157	44	1.24	1.19	-26.5	-26.6	-21.3	-19	-36.4	-39.5	-28.12	-24	-21.91	-19.15
2009 AartsmaRus	Aartsma-Rus	2OMePS	45	h45AON10#	16	0.142	143	17	short	Up to 5%	0	0	0	176	A			4.44146	0.261	1.96e-06	0.0044566	3.04e-06	0.0044566	0.365313	65	11	0.37	1.76	28	2.03	0.05	0.46	81	11.1	69.9	159	44	1.24	1.19	-19.7	-23.2	-21.4	-19.6	-23.8	-32.8	-18.55	-20.81	-18.1	-13.69
2009 AartsmaRus	Aartsma-Rus	2OMePS	45	h45AON11#	35	0.259	121	20	short	>5%		1		176	A			7.3154	0.366	0.00104337	0.108479	0.0813171	0.306792	0.468932	40	8	0.37	1.08	3	-0.77	-0.02	0.46	81	8	73	156	46.8	1.24	1.26	-17.4	-16	-21.3	-16.5	-17.2	-30.4	-15.89	-11.66	-15.59	-11.07
2009 AartsmaRus	Aartsma-Rus	2OMePS	45	h45AON12#	93	0.591	62	21	short	Up to 5%	0	0	0	176	A			4.1084	0.196	0.000274653	0.0700103	0.00553231	0.0700103	0.517486	33	7	0.37	0.89	-4	-1.76	-0.05	0.46	81	6.9	74.1	155	47.8	1.24	1.29	-23	-26	-24.1	-20.7	-27.5	-33.3	-22.67	-24.19	-24.15	-20.39
2009 AartsmaRus	Aartsma-Rus	2OMePS	46	PS 183	2	0.101	121	25	long	>5%		1		148	C			7.61434	0.305	6.98e-05	0.0434003	0.0204844	0.127974	0.430093	28	7	0.245	1.14	3.5	-1.45	-0.06	0.35	52	7	45	123	36.6	1.43	1.49	-30.7	-17.4	-19.4	-15.8	-33	-35.5	-30.11	-17.23	-16.14	-17.84
2009 AartsmaRus	Aartsma-Rus	2OMePS	46	PS 182	57	0.473	66	25	long	>5%		1		148	C			6.0492	0.242	8.72e-07	0.0429746	0.000790377	0.0429746	0.35318	40	10	0.245	1.63	15.5	0.99	0.04	0.35	52	10	42	123	34.1	1.43	1.39	-34.9	-36.9	-29.7	-28.2	-34.9	-42.2	-34.74	-37.05	-25.63	-24.59
2009 AartsmaRus	Aartsma-Rus	2OMePS	46	PS 181	69	0.554	54	25	long	>5%		1		148	C			4.7293	0.189	8.19e-06	0.0588095	0.0320388	0.164086	0.497171	40	10	0.245	1.63	15.5	0.99	0.04	0.35	52	10	42	123	34.1	1.43	1.39	-32.5	-30.5	-26	-24	-32.5	-42.2	-32.27	-27.67	-24.9	-24.05
2009 AartsmaRus	Aartsma-Rus	2OMePS	46	PS 180	79	0.622	44	25	long	Up to 5%	0	0	0	148	C			2.69766	0.108	0.00630421	0.239338	0.0147966	0.246141	0.614789	44	11	0.245	1.8	19.5	1.8	0.07	0.35	52	11	41	123	33.3	1.43	1.36	-34.9	-36.1	-42.5	-36.5	-37.3	-42.1	-30.92	-31.48	-34.44	-33
2009 AartsmaRus	Aartsma-Rus	2OMePS	46	h46AON26L	86	0.669	37	25	long	>5%		1		148	C			9.18946	0.368	0.000260649	0.0141081	0.00489068	0.404606	0.574077	40	10	0.245	1.63	15.5	0.99	0.04	0.35	52	10	42	123	34.1	1.43	1.39	-34.6	-37.3	-36.7	-35.5	-35.7	-44.4	-31.33	-31.75	-36.37	-34.37
2009 AartsmaRus	Aartsma-Rus	2OMePS	46	PS 177	93	0.699	35	20	short	>5%		1		148	C			12.4033	0.62	0.000854241	0.017147	0.00296578	0.404606	0.587397	45	9	0.245	1.84	20.5	1.54	0.06	0.35	52	9	43	128	33.6	1.43	1.37	-28.6	-27.6	-27.8	-24.7	-30.2	-35.4	-27.47	-25.38	-29.25	-24.89
2009 AartsmaRus	Aartsma-Rus	2OMePS	46	PS 179	108	0.818	15	25	long	>5%		1		148	C			15.6351	0.625	0.00142425	0.21384	0.118778	0.535659	0.66944	36	9	0.245	1.47	11.5	0.18	0.01	0.35	52	9	43	123	35	1.43	1.43	-37.9	-33.3	-28.2	-29.4	-34.8	-36.3	-33.6	-30.88	-26.27	-20.33
2009 AartsmaRus	Aartsma-Rus	2OMePS	46	PS 178	113	0.834	15	20	short	Up to 5%	0	0	0	148	C			10.6459	0.532	0.00298752	0.21384	0.118778	0.535659	0.651429	40	8	0.245	1.63	15.5	0.76	0.03	0.35	52	8	44	128	34.4	1.43	1.4	-29.8	-24.9	-21.1	-23	-26.7	-29.1	-26.51	-22.73	-20.17	-16.12
2009 AartsmaRus	Aartsma-Rus	2OMePS	51	h51AON23MRP	61	0.318	147	25	long	>5%		1		233	A			4.3778	0.175	4.84e-05	0.00855665	0.000962176	0.130801	0.570311	36	9	0.26	1.38	10	-1.24	-0.05	0.46	108	9	99	208	47.6	1.78	1.83	-32.1	-28.1	-27.9	-23	-31.1	-41	-28.29	-25.2	-26.86	-26.1
2009 AartsmaRus	Aartsma-Rus	2OMePS	52	h52AON3N#	16	0.225	82	20	short	>5%		1		118	C			7.68652	0.384	2.21e-06	0.0026788	1.21e-05	0.00936723	0.373344	65	13	0.28	2.32	37	4.1	0.15	0.45	53	13	40	98	40.8	1.6	1.46	-31.8	-27.6	-26.7	-20.3	-34.4	-42.8	-28.37	-26.71	-25.35	-20.33
2009 AartsmaRus	Aartsma-Rus	2OMePS	52	h52AON4N#	16	0.246	77	25	long	>5%		1		118	C			9.23242	0.369	6.26e-07	0.0154648	0.00020502	0.0368101	0.384818	60	15	0.28	2.14	32	4.06	0.14	0.45	53	15	38	93	40.9	1.6	1.46	-41.5	-38	-36.5	-33.1	-42.4	-53.2	-38.11	-35.16	-34.96	-31.89
2009 AartsmaRus	Aartsma-Rus	2OMePS	52	h52AON7	56	0.559	43	19	short	Up to 5%	0	0	0	118	C			3.49616	0.184	0.00249135	0.113737	0.0600857	0.21748	0.496958	32	6	0.28	1.14	4	-2.48	-0.09	0.45	53	6.1	46.9	99	47.4	1.6	1.69	-25.3	-24.5	-21.8	-15	-26.1	-25.5	-21.28	-20.69	-17.89	-17.67
2009 AartsmaRus	Aartsma-Rus	2OMePS	52	h52AON6	57	0.572	41	20	short	Up to 5%	0	0	0	118	C			5.00796	0.25	0.00449253	0.145866	0.0955138	0.21748	0.541773	30	6	0.28	1.07	2	-3.04	-0.11	0.45	53	6	47	98	48	1.6	1.71	-24.5	-21.4	-21	-15.7	-24	-26.4	-21.14	-20.16	-17.95	-17.53
2009 AartsmaRus	Aartsma-Rus	2OMePS	52	h52AON5	59	0.589	39	20	short	Up to 5%	0	0	0	118	C			6.958	0.348	0.0415449	0.11079	0.0488231	0.145866	0.580347	25	5	0.28	0.89	-3	-4.06	-0.15	0.45	53	5	48	98	49	1.6	1.75	-26.6	-21.2	-21.3	-15	-26.1	-24.2	-19.47	-18.67	-16.36	-15.43
2009 AartsmaRus	Aartsma-Rus	2OMePS	52	h52AON4	61	0.606	37	20	short	Up to 5%	0	0	0	118	C			7.8784	0.394	0.0107075	0.0639088	0.0126053	0.145866	0.593711	25	5	0.28	0.89	-3	-4.06	-0.15	0.45	53	5	48	98	49	1.6	1.75	-24.5	-23.3	-22	-16.3	-25.1	-24.3	-20.74	-21.02	-16.72	-18.14
2009 AartsmaRus	Aartsma-Rus	2OMePS	52	h52AON3	65	0.631	35	18	short	Up to 5%	0	0	0	118	C			11.9946	0.666	0.00453077	0.0602349	0.00531485	0.145866	0.498029	39	7	0.28	1.39	11	-1.06	-0.04	0.45	53	7	46	100	46	1.6	1.64	-25.5	-22.8	-18.1	-15.4	-26.3	-24.7	-19.73	-20.75	-15.88	-14.02
2009 AartsmaRus	Aartsma-Rus	2OMePS	52	h52AON1long#	67	0.678	26	25	long	>5%		1		118	C			18.7671	0.751	0.00126881	0.568286	0.0153182	0.568286	0.595144	40	10	0.28	1.43	12	-1.32	-0.05	0.45	53	10	43	93	46.2	1.6	1.65	-40.3	-34.1	-34.6	-29.2	-40.1	-39.8	-33.86	-30.7	-31	-30.14
2009 AartsmaRus	Aartsma-Rus	2OMePS	64	h64AON1	15	0.34	40	20	short	Up to 5%	0	0	0	75	C			-0.4559	-0.023	3.93e-06	0.00841554	4.39e-05	0.00841554	0.371943	35	7	0.4	0.88	-5	-4.24	-0.11	0.47	35	7	28	55	50.9	1.17	1.27	-24.7	-25.6	-21	-25.3	-29	-33	-22.79	-20.85	-18.99	-13.01
2009 AartsmaRus	Aartsma-Rus	2OMePS	64	h64AON2	48	0.767	9	18	short	Up to 5%	0	0	0	75	C			12.1625	0.676	0.00306912	0.0372238	0.00731967	0.0427406	0.407166	61	11	0.4	1.53	21	4.53	0.11	0.47	35	11	24	57	42.1	1.17	1.05	-28.1	-25.5	-25	-23.4	-28.1	-34	-24.69	-23.06	-20.78	-21.33
2012 Dwi Pramono	Dwi Pramono	2OMePS	2	AON2-1	3	0.266	33	26	long	64.6	2	1	1	62	D			13.6657	0.526	0.000197512	0.0229573	0.00922606	0.249452	0.477775			0.275					0.29	18			36		1.06		-31.6	-30.8	-24.5	-16.1	-32.5	-36.1	-29.04	-26.94	-22.9	-22.82
2012 Dwi Pramono	Dwi Pramono	2OMePS	2	AON2-2	16	0.492	18	28	long	64.5	2	1	1	62	D			3.8243	0.137	0.0006673	0.0253065	0.00279272	0.249452	0.510399			0.275					0.29	18			34		1.06		-35.3	-40.1	-36.3	-31.1	-38.4	-40.4	-32.32	-34.34	-34.51	-28.33
2012 Dwi Pramono	Dwi Pramono	2OMePS	43	AON43-1	0	0.087	144	29	long	25.4	1	1	1	173	C			6.7786	0.234	0.000287181	0.153845	0.0355785	0.243163	0.457317			0.27					0.42	73			144		1.56		-42.8	-36.6	-34.2	-32	-42.8	-42.1	-41.76	-33.62	-30.86	-27.37
2012 Dwi Pramono	Dwi Pramono	2OMePS	43	AON43-2	87	0.578	61	25	long	6	0	0	0	173	C			10.6635	0.427	2.16e-08	0.00321147	0.000154274	0.14234	0.454845			0.27					0.42	73			148		1.56		-29.1	-33.6	-29.8	-24.6	-34.5	-48	-27.68	-29.79	-28.01	-28.23
2012 Dwi Pramono	Dwi Pramono	2OMePS	45	AON45-1	39	0.313	106	31	long	28.8	1	1	1	176	A			10.9008	0.352	4.05e-05	0.307179	0.00117809	0.307179	0.548104			0.37					0.46	81			145		1.24		-38.5	-42.3	-42.2	-37.1	-41.4	-50.8	-38.62	-37.67	-35.47	-33.73
2012 Dwi Pramono	Dwi Pramono	2OMePS	45	AON45-2	98	0.616	58	20	short	13	1	1	0	176	A			2.8902	0.145	0.000256629	0.132609	0.00424972	0.147946	0.510824			0.37					0.46	81			156		1.24		-23	-22.3	-24.1	-15.4	-25.2	-27.6	-20.19	-21	-21.7	-19.06
2012 Dwi Pramono	Dwi Pramono	2OMePS	45	AON45-3	151	0.926	2	23	long	0	0	0	0	176	A			12.755	0.555	0.0193448	0.289486	0.0348205	0.331982	0.666532			0.37					0.46	81			153		1.24		-34.3	-25.5	-24.4	-28.4	-33.3	-36.9	-33.65	-24.59	-24.47	-27.38
2012 Dwi Pramono	Dwi Pramono	2OMePS	46	AON46-1	0	0.098	120	28	long	33	2	1	1	148	C			8.34594	0.298	2.44e-05	0.045056	0.0205864	0.127974	0.431222			0.245					0.35	52			120		1.43		-36.8	-24.9	-25.2	-19.3	-39.2	-43.1	-36.49	-23.51	-20.57	-23.53
2012 Dwi Pramono	Dwi Pramono	2OMePS	46	AON46-2	88	0.686	34	26	long	25.2	1	1	0	148	C			13.3869	0.515	0.000253939	0.0181586	0.00298177	0.404606	0.606022			0.245					0.35	52			122		1.43		-35.3	-34.6	-36.4	-32.9	-36.4	-45.9	-34.76	-31.78	-37.66	-33.56
2012 Dwi Pramono	Dwi Pramono	2OMePS	47	AON47-1	38	0.357	82	30	long	32.6	2	1	1	150	A			12.5705	0.419	6.93e-06	0.00842274	0.000100042	0.313707	0.537411			0.405					0.45	67			120		1.1		-37.6	-38.9	-34.6	-36.7	-45	-50.3	-35.65	-37.48	-33.17	-31.67
2012 Dwi Pramono	Dwi Pramono	2OMePS	47	AON47-2	80	0.627	43	27	long	14	1	1	0	150	A			15.4467	0.572	0.000371073	0.0216924	0.00396861	0.312502	0.658883			0.405					0.45	67			123		1.1		-33.2	-34.3	-35.1	-36.9	-40.2	-49.7	-31.17	-32.82	-31.66	-30.39
2012 Dwi Pramono	Dwi Pramono	2OMePS	47	AON47-3	127	0.92	2	21	short	0	0	0	0	150	A			10.165	0.484	0.00405154	0.0304734	0.0063826	0.13798	0.526161			0.405					0.45	67			129		1.1		-28.1	-33	-30.1	-25.2	-28.1	-34.3	-26.03	-28.96	-22.21	-21.96
2012 Dwi Pramono	Dwi Pramono	2OMePS	50	AON50-1	5	0.156	81	23	long	37.6	2	1	1	109	C			14.9017	0.648	2.67e-05	0.00129455	3.28e-05	0.0572798	0.371675			0.255					0.51	56			86		2.01		-29.4	-29.8	-31.1	-29	-36.8	-40.7	-28.2	-28.01	-24.69	-28.61
2012 Dwi Pramono	Dwi Pramono	2OMePS	51	AON51-1	4	0.084	199	30	long	100	2	1	1	233	A			10.5773	0.353	7.38e-07	0.00653017	8.19e-06	0.124294	0.498644			0.26					0.46	108			203		1.78		-45.9	-45.5	-42.3	-40.9	-46.4	-56.7	-44.49	-43.57	-39.49	-40.18
2012 Dwi Pramono	Dwi Pramono	2OMePS	51	AON51-2	41	0.245	161	31	long	100	2	1	1	233	A			17.2071	0.555	1.34e-05	0.130801	0.0142411	0.130801	0.460819			0.26					0.46	108			202		1.78		-41	-37.3	-38.4	-34.3	-45.1	-53.3	-37.97	-35.56	-34.2	-33.81
2012 Dwi Pramono	Dwi Pramono	2OMePS	51	AON51-3	161	0.738	51	21	short	30.8	2	1	1	233	A			-1.31864	-0.063	0.000111133	0.00401384	0.00111086	0.27685	0.498247			0.26					0.46	108			212		1.78		-17.8	-18.7	-11.1	-21.1	-22	-30.3	-17.12	-18.99	-15.88	-20.36
2012 Dwi Pramono	Dwi Pramono	2OMePS	53	AON53-1	16	0.137	171	25	long	34.9	2	1	1	212	A			11.32	0.453	1.5e-05	0.315646	0.0041439	0.555611	0.545914			0.275					0.44	93			187		1.59		-38.7	-34.9	-28.2	-29.7	-40.6	-44.5	-37.04	-35.06	-29.71	-28.58
2012 Dwi Pramono	Dwi Pramono	2OMePS	53	AON53-2	25	0.184	160	27	long	59	2	1	1	212	A			19.8191	0.734	8.46e-05	0.0541301	0.00122197	0.555611	0.564555			0.275					0.44	93			185		1.59		-38.5	-41.4	-36.3	-31.3	-39.6	-47.6	-36.48	-37.06	-33.6	-31.04
2012 Dwi Pramono	Dwi Pramono	2OMePS	53	AON53-3	31	0.222	150	31	long	55.5	2	1	1	212	A			22.6366	0.73	1.79e-06	0.00260741	0.000173323	0.555611	0.607679			0.275					0.44	93			181		1.59		-48.4	-45.6	-42.2	-43.8	-51.6	-60.5	-45.27	-40.89	-37.53	-38.52
2012 Dwi Pramono	Dwi Pramono	2OMePS	53	AON53-4	184	0.932	2	26	long	0	0	0	0	212	A			17.1239	0.659	0.00228997	0.192129	0.0733725	0.383331	0.703865			0.275					0.44	93			186		1.59		-36.3	-35.4	-32.3	-29.9	-33.9	-38.4	-35.62	-29.63	-31.07	-30.52
2012 Dwi Pramono	Dwi Pramono	2OMePS	57	AON57-1	3	0.092	132	22	long	25.4	1	1	0	157	C			5.7347	0.261	2.5e-06	0.101489	0.00023446	0.101489	0.450654			0.345					0.51	80			135		1.48		-34.7	-31.9	-22.8	-29.1	-32.7	-40.2	-30.88	-25.61	-17.87	-25.45
2012 Dwi Pramono	Dwi Pramono	2OMePS	57	AON57-2	71	0.529	63	23	long	5	0	0	0	157	C			15.1848	0.66	0.0100895	0.576772	0.182556	0.576772	0.598705			0.345					0.51	80			134		1.48		-29.9	-30.2	-23.2	-20.2	-31.8	-34.3	-29.64	-26.77	-20.55	-19.92
2012 Dwi Pramono	Dwi Pramono	2OMePS	57	AON57-3	132	0.911	4	21	short	0	0	0	0	157	C			11.1933	0.533	0.000194954	0.129681	0.00178491	0.129681	0.52531			0.345					0.51	80			136		1.48		-34	-31.5	-27.1	-35.8	-30.8	-35.8	-31.15	-26.84	-26.05	-31.66
[truncated: 13 more columns]
